# 1           **Repurposing of drugs as novel influenza inhibitors from clinical gene** 2                                           **expression infection signatures**

3  
4   **Authors:** Andrés Pizzorno<sup>1,2¶</sup>, Olivier Terrier<sup>1¶\*</sup>, Claire Nicolas de Lamballerie<sup>1,3</sup>, Thomas  
5 Julien<sup>1,4</sup>, Blandine Padey<sup>1,4</sup>, Aurélien Traversier<sup>1</sup>, Magali Roche<sup>3</sup>, Marie-Eve Hamelin<sup>2</sup>, Chantal  
6 Rhéaume<sup>2</sup>, Séverine Croze<sup>5</sup>, Vanessa Escuret<sup>1,6</sup>, Julien Poissy<sup>7</sup>, Bruno Lina<sup>1,6</sup>, Catherine Legras-  
7 Lachuer<sup>3,8</sup>, Julien Textoris<sup>9,10</sup>, Guy Boivin<sup>2</sup> and Manuel Rosa-Calatrava<sup>1,3\*</sup>.

8  
9   <sup>1</sup> Virologie et Pathologie Humaine - VirPath team, Centre International de Recherche en  
10 Infectiologie (CIRI), INSERM U1111, CNRS UMR5308, ENS Lyon, Université Claude Bernard  
11 Lyon 1, Université de Lyon, Lyon 69008, France.

12   <sup>2</sup> Research Center in Infectious Diseases of the CHU de Quebec and Laval University, Quebec  
13 City, QC G1V 4G2, Canada.

14   <sup>3</sup> Viroscan3D SAS, Lyon 69008, France.

15   <sup>4</sup> VirNext, Faculté de Médecine RTH Laennec, Université Claude Bernard Lyon 1, Université de  
16 Lyon, Lyon 69008, France.

17   <sup>5</sup> ProfileXpert, SFR-Est, CNRS UMR-S3453, INSERM US7, Université Claude Bernard Lyon 1,  
18 Université de Lyon, Lyon 69008, France.

19   <sup>6</sup> Laboratoire de Virologie, Centre National de Référence des virus Influenza Sud, Institut des  
20 Agents Infectieux, Groupement Hospitalier Nord, Hospices Civils de Lyon, Lyon F-69317,  
21 France.

22 <sup>7</sup> Pôle de Réanimation, Hôpital Roger Salengro, Centre Hospitalier Régional et Universitaire de  
23 Lille, Université de Lille 2, Lille 59000, France.

24 <sup>8</sup> Ecologie Microbienne, UMR CNRS 5557, USC INRA 1364, Université Claude Bernard Lyon  
25 1, Université de Lyon, Villeurbanne 69100, France.

26 <sup>9</sup> Service d'Anesthésie et de Réanimation, Hôpital Edouard Herriot, Hospices Civils de Lyon,  
27 Lyon 69003, France.

28 <sup>10</sup> Pathophysiology of Injury-Induced Immunosuppression (PI3), EA 7426 Hospices Civils de  
29 Lyon, bioMérieux, Université Claude Bernard Lyon 1, Hôpital Edouard Herriot, Lyon 69003,  
30 France.

31

32 \* Corresponding authors:

33 [olivier.terrier@univ-lyon1.fr](mailto:olivier.terrier@univ-lyon1.fr) (OT), [manuel.rosa-calatrava@univ-lyon1.fr](mailto:manuel.rosa-calatrava@univ-lyon1.fr) (MRC)

34 ¶ These authors contributed equally to this work.

35

36 Text count: 6365 words

37 Inserts: 6 figures, 1 table, supplementary material

38

39 Keywords: Influenza viruses; antivirals; inhibitors of viral infection; transcriptome; host  
40 targeting, drug repurposing

41

## 42 **Abstract**

43 **Background:** Influenza virus infections remain a major and recurrent public health burden. The  
44 intrinsic ever-evolving nature of this virus, the suboptimal efficacy of current influenza  
45 inactivated vaccines, as well as the emergence of resistance against a limited antiviral arsenal,  
46 highlight the critical need for novel therapeutic approaches. In this context, the aim of this study  
47 was to develop and validate an innovative strategy for drug repurposing as host-targeted  
48 inhibitors of influenza viruses and the rapid evaluation of the most promising candidates in Phase  
49 II clinical trials.

50 **Methods:** We exploited *in vivo* global transcriptomic signatures of infection directly obtained  
51 from a patient cohort to determine a shortlist of already marketed drugs with newly identified,  
52 host-targeted inhibitory properties against influenza virus. The antiviral potential of selected  
53 repurposing candidates was further evaluated *in vitro*, *in vivo* and *ex vivo*.

54 **Results:** Our strategy allowed the selection of a shortlist of 35 high potential candidates out of a  
55 rationalized computational screening of 1,309 FDA-approved bioactive molecules, 31 of which  
56 were validated for their significant *in vitro* antiviral activity. Our *in vivo* and *ex vivo* results  
57 highlight diltiazem, a calcium channel blocker currently used in the treatment of hypertension, as  
58 a promising option for the treatment of influenza infections. Additionally, transcriptomic  
59 signature analysis further revealed the so far undescribed capacity of diltiazem to modulate the  
60 expression of specific genes related to the host antiviral response and cholesterol metabolism.  
61 Finally, combination treatment with diltiazem and virus-targeted oseltamivir neuraminidase  
62 inhibitor further increased antiviral efficacy, prompting rapid authorization for the initiation of a  
63 Phase II clinical trial.

64 **Conclusions:** This original, host-targeted, drug repurposing strategy constitutes an effective and  
65 highly reactive process for the rapid identification of novel anti-infectious drugs, with potential  
66 major implications for the management of antimicrobial resistance and the rapid response to  
67 future epidemic or pandemic (re)emerging diseases for which we are still disarmed.

68

## 69 **Background**

70 Besides their well-known pandemic potential, annual outbreaks caused by influenza viruses  
71 account for several million respiratory infections and 250,000 to 500,000 deaths worldwide [1].  
72 This global high morbidity and mortality of influenza infections represents a major and recurrent  
73 public health threat with high economic burden. In this context, the suboptimal vaccine coverage  
74 and efficacy, coupled with recurrent events of viral resistance against a very limited antiviral  
75 portfolio, emphasize an urgent need for innovative treatment strategies presenting fewer  
76 obstacles for their clinical use [2].

77 For decades, the strategy for antiviral development was mostly based on serial screenings of  
78 hundreds of thousands of molecules to identify “hits” and ‘leads” that target specific viral  
79 determinants, a quite costly and time-consuming process. However, the dramatic reduction in  
80 successful candidate identification over time [3], along with a concomitant increase of regulatory  
81 complexity to implement clinical trials, have fostered rising interest in novel strategies. Indeed,  
82 new approaches, focused on targeting the host instead of the virus, as well as on marketed drug  
83 repurposing for new antiviral indications [3–5] have been recently proposed in the context of  
84 global health emergencies posed by Ebola [6] and Zika [7] viruses. Such innovative strategies  
85 are strongly supported by a shift of paradigms in drug discovery, from “one-drug-one-target” to  
86 “one-drug-multiple-targets” [8]. In that sense, different *in silico* approaches based on structural  
87 bioinformatic studies [9, 10], systems biology approaches [11] and host gene expression analyses  
88 [12] have been applied to decipher multi-purpose effects of many US Food and Drug  
89 Administration (FDA)-approved drugs. Additionally, as successfully demonstrated in  
90 antiretroviral therapy [13], targeting host instead of viral determinants may confer a broad-  
91 spectrum antiviral efficacy, and also reduce the risk of emergence of drug resistance against

92 influenza viruses [14]. As a result, the last decade has witnessed several host-directed  
93 experimental approaches against influenza infections, notably nitazoxanide, DAS181 or  
94 acetylsalicylic acid [15–17].

95 In line with this emerging trend, we previously postulated that host global gene expression  
96 profiling can be considered as a “fingerprint” or signature of any specific cell state, including  
97 during infection or drug treatment, and hypothesized that the screening of databases for  
98 compounds that counteract virogenomic signatures could enable rapid identification of effective  
99 antivirals [18]. Based on this previous proof-of-concept obtained from *in vitro* gene expression  
100 profiles, we further improved our strategy by analyzing paired upper respiratory tract clinical  
101 samples collected during the acute infection and after recovery from a cohort of influenza  
102 A(H1N1)pdm09-infected patients and determined their respective transcriptomic signatures. We  
103 then performed an *in silico* drug screening using Connectivity Map (CMAP), the Broad  
104 Institute’s publicly available database of more than 7,000 drug-associated gene expression  
105 profiles [19, 20], and identified a list of candidate bioactive molecules with signatures anti-  
106 correlated with those of the patient’s acute infection state (**Figure 1A**). The potential antiviral  
107 properties of selected FDA-approved molecules were firstly validated *in vitro*, and the most  
108 effective compounds were further compared to oseltamivir for the treatment of influenza  
109 A(H1N1)pdm09 virus infections in both C57BL/6 mice and 3D reconstituted human airway  
110 epithelia. Altogether, our results highlight diltiazem, a calcium channel blocker with so far  
111 undescribed capacity to stimulate the epithelial antiviral defense, as a promising repurposed host-  
112 targeted inhibitor of influenza infection. Moreover, our results plead in favor of the combination  
113 of diltiazem with the virus-targeted antiviral oseltamivir for the improvement of current anti-  
114 influenza therapy, and possibly decreasing the risk of antiviral resistance. This study confirms

115 the feasibility and interest of integrating clinical virogenomic and chemogenomic inputs as part  
116 of a drug repurposing strategy to accelerate bedside-to-bench and bench-to-bedside drug  
117 development.

118

## 119 **Methods**

### 120 **Clinical samples**

121 A previously published randomized clinical trial (ClinicalTrials.gov identifier NCT00830323)  
122 was conducted in Lyon and Paris (France) during the peak circulation of the influenza  
123 A(H1N1)pdm09 virus, with the aim to assess the efficacy of oseltamivir-zanamivir combination  
124 therapy compared with oseltamivir monotherapy [21]. Briefly, patients tested positive for  
125 influenza A infection by the QuickVue rapid antigen kit (Quidel) were randomized in one of the  
126 two treatment groups and nasal wash specimens were collected within two hours of the first visit  
127 and every 24 h until 96 h after treatment initiation. Nasal swabs were also performed on days 5  
128 and 7. In voluntary patients, an optional supplementary nasal wash was performed at least three  
129 months after influenza infection (recovery phase). H1N1 subtype was further confirmed by PCR.  
130 For nine of these patients, transcriptomic data were obtained from paired samples collected  
131 during influenza infection without treatment and in the recovery phase.

132

### 133 **Sample processing, RNA preparation and hybridization**

134 Nasal wash samples were collected in RNAlater® Stabilization Solution (Thermo Fisher  
135 Scientific). Total RNA was extracted using RNeasy Micro kit (Qiagen) following the  
136 manufacturer's instructions. RNA quality was assessed using a Bioanalyzer2100 (Agilent  
137 technologies, Inc, Palo Alto, CA, USA). To account for samples having low amount and/or  
138 partially degraded RNA (RNA Integrity Numbers between 1 and 8), we applied two types of  
139 corrections: i) cRNA labelling was performed after a linear amplification protocol, as previously  
140 described [22] and ii) raw signals obtained after hybridization of labelled cRNA on microarray



141 and data acquisition were processed using the MAXRS algorithm [23]. Labeled cRNA were  
142 hybridized on Affymetrix HG-U133plus2 microarrays according to manufacturer's instructions  
143 in a GeneChip® Hybridization Oven 640 (Affymetrix) and microarrays were subsequently  
144 scanned in an Affymetrix 3000 7G scanner.

145

#### 146 **Data normalization & MAXRS computational analysis**

147 The MAXRS algorithm [23] is particularly suited to gene expression analysis under low  
148 hybridization conditions. Briefly, this method takes advantage of the specific design of  
149 Affymetrix probe sets, which are composed of an average of 11 different probes that target the  
150 same locus, and is based on the observation that for most of the probe sets the same probe shows  
151 the highest fluorescence intensity in almost all arrays. For each microarray ( $m = 1..M$ ) and for  
152 each probeset ( $t = 1..T$ ), fluorescence intensity values on microarray  $m$  of all probes ( $p = 1..P_t$ )  
153 belonging to the probeset  $t$  are sorted in increasing order. These ranks are denoted as  $r_{mtp}$ . Then,  
154 we calculated across all microarrays the rank sum ( $RS_{tp}$ ) for each probeset  $t$  for each probe  $p$   
155 belonging to the probeset  $t$ . Finally, for each probeset  $t$ , we kept the three probes  $p$  with the  
156 highest  $RS_{tp}$ . The mean intensity of these three probes is attributed to the probeset  $t$ . As it is  
157 common practice with many modern pre-processing algorithms, and because of the low global  
158 fluorescence signal intensity, mismatched probes were excluded from MAXRS analysis.

159 After pre-processing the raw dataset with the MAXRS algorithm, a normalization step was  
160 performed using Tukey median-polish algorithm [24]. Differential expression was assessed by  
161 applying a Student t-test for each probeset, and multiple testing was corrected using the  
162 Benjamini-Hochberg algorithm in the qvalue library [25]. For further downstream analysis,  
163 genes were selected according to two criteria: i) absolute fold change  $>2$ , and ii) corrected p-

164 value <0.05. Data were generated according to the Minimum Information About a Microarray  
165 Experiment guidelines and deposited in the National Center for Biotechnology Information's  
166 Gene Expression Omnibus [26] under accession number GSE93731.

167

## 168 **Functional analysis**

169 Functional enrichment analysis was performed on a selection of differentially-expressed genes  
170 with DAVID tools [27], using the Gene Ontology (GO) [28]. To further select genes for the  
171 CMAP query, we selected 6 Biological Process terms (GO\_BP: GO:0009615-response to virus;  
172 GO:0006955-immune response; GO:0042981-regulation of apoptosis; GO:0006952-defense  
173 response; GO:0009611-response to wounding; GO:0042127-regulation of cell proliferation) that  
174 shared > 90% of genes with all significantly enriched GO\_BP terms, and 3 relevant Cellular  
175 Component terms (GO\_CC: GO:0031225-anchored to membrane; GO:0005829-cytosol;  
176 GO:0005654-nucleoplasm). To visualize and compare the different lists of compounds, Venn  
177 diagrams were obtained using the webtool developed by Dr. Van de Peer's Lab at Ghent  
178 University (<http://bioinformatics.psb.ugent.be/webtools/Venn/>).

179

## 180 **Cells and viruses**

181 Human lung epithelial A549 cells (ATCC CCL-185) were maintained in Dulbecco's modified  
182 Eagle's medium (DMEM) supplemented with 10 % foetal calf serum and supplemented with 2  
183 mM L-glutamine (Sigma Aldrich), penicillin (100 U/mL) and streptomycin (100 µg/mL)  
184 (Lonza), maintained at 37 °C and 5% CO<sub>2</sub>.

185 Influenza viruses A/Lyon/969/09 and A/Quebec/144147/09 were produced in MDCK (ATCC  
186 CCL-34) cells in EMEM supplemented with 2 mM L-glutamine (Sigma Aldrich), penicillin (100  
187 U/mL), streptomycin (100 µg/mL) (Lonza) and 1 µg/mL trypsin. Viral titers in plaque forming  
188 units (PFU/ml) and tissue culture infectious dose 50% (TCID50/mL) were determined in MDCK  
189 cells as previously described [29, 30].

190

### 191 **Viral growth assays**

192 For viral growth assays in the presence of molecules, A549 cells were seeded 24 h in advance in  
193 multi-well 6 plates at  $1.8 \times 10^5$  cells/well. Three treatment protocols were evaluated. 1) In pre-  
194 treatment protocol, cells were washed with DMEM and then incubated with different  
195 concentrations of candidate molecules diluted in DMEM supplemented with 2 mM L-glutamine  
196 (Sigma Aldrich), penicillin (100 U/mL), streptomycin (100 µg/mL) (Lonza) and 0.5 µg/mL  
197 trypsin. Six hours after treatment, cells were washed and then infected with A/Lyon/969/09  
198 (H1N1)pdm09 virus at a MOI of 0.1. 2) In pre-treatment plus post-treatment protocol, cells were  
199 initially treated and infected in the same conditions as explained above. One hour after viral  
200 infection, a second identical dose of candidate molecules in supplemented DMEM was added. 3)  
201 In post-treatment protocol, cells without pre-treatment were infected in the conditions described  
202 and treatments with candidate molecules at the indicated concentrations were initiated 24 h p.i.  
203 In all cases, supernatants were collected at 48 h p.i. and stored at -80 °C for TCID50/ml viral  
204 titration.

### 205 **Viability and cytotoxicity assays**

206 Cell viability was measured using the CellTiter 96® AQueous One Solution Cell Proliferation  
207 Assay (MTS, Promega). A549 cells were seeded into 96-well plates and treated with different  
208 concentrations of molecules or solvents. Cells were incubated at 37 °C and 5% CO<sub>2</sub> and then  
209 harvested at different time-points, following the same scheme as in viral growth assays. Results  
210 were presented as a ratio of control values obtained with solvents. Treatment-related toxicity in  
211 human airway epithelia (HAE) was measured using the Cytotoxicity Detection Kit<sup>PLUS</sup> (LDH,  
212 Roche) according to the manufacturer's instructions. Briefly, duplicate 100 µL-aliquots of  
213 basolateral medium from treated and control HAEs were incubated in the dark (room  
214 temperature, 30 minutes) with 100 µL of lactate dehydrogenase (LDH) reagent in 96-well plates.  
215 After incubation, "stop solution" was added and the absorbance was measured in a conventional  
216 microplate ELISA reader. The photometer was set up for dual readings to determine non-specific  
217 background at 750 nm, and absorbance was measured at 490 nm. Percent cytotoxicity was  
218 calculated as indicated by the manufacturer, using mock-treated and 1% triton-treated epithelia  
219 as "low" and "high" controls, respectively. Percent viability is presented as 100 – percent  
220 cytotoxicity.

221

## 222 **Mouse model of viral infection**

223 All protocols were carried out in seven to nine-week old female C57BL/6N mice (Charles River,  
224 QC, Canada). Animals were randomized in groups of 15 according to their weight to ensure  
225 comparable median values on each group, and then housed in micro-isolator cages (5 animals per  
226 cage) in a biosafety 2 controlled environment (22 °C, 40% humidity, 12:12 h photoperiods), with  
227 *ad libitum* access to food and water.

228 On day 0, mice were lightly anesthetized with inhaled 3% isoflurane/oxygen, and then infected  
229 by intranasal (i.n.) instillation of influenza A/Quebec/144147/09 (H1N1)pdm09 virus in 30 µl of  
230 saline, as specified in each case. Control animals were mock-infected with 30 µl of saline.  
231 Candidate molecules were evaluated in two different treatment protocols: i) treatments were  
232 started on the same day of infection (day 0, 6 h prior to infection), or ii) treatments were started  
233 24 h after infection (day 1). Regardless of treatment initiation time, all treatments were  
234 performed *per os* (150-µl gavage) once daily for 5 consecutive days (5 drug administrations in  
235 total). Mortality, body weight and clinical signs such as lethargy and ruffled fur were daily  
236 monitored on 10 animals/group for a total of 14 days. Animals were euthanized if they reached  
237 the humane endpoint of >20% weight loss. The remaining 5 animals/group were euthanized on  
238 day 5 p.i. to measure LVTs.

239 Vehicle (saline) or oseltamivir were used as placebo and positive treatment control, respectively.  
240 The oseltamivir dose (10 mg/kg/day) was adjusted to confer ~50% protection in the selected  
241 experimental conditions and is considered a good correlate of half the normal dose of 150  
242 mg/day given to humans [31]. The doses of repurposed candidate molecules were selected to be  
243 in the non-toxic range for mouse studies, according to published preclinical data for their first  
244 therapeutic indication. To validate this choice in our specific model, potential drug toxicity was  
245 evaluated in mock-infected animals treated with the same regimens as virus-infected mice.

246

### 247 **Pulmonary viral titers**

248 In order to evaluate the effect of different treatments on viral replication, 5 animals per group  
249 were euthanized on day 5 p.i. and lungs were removed aseptically. Mice were randomly selected  
250 from the 3 cages of each group to minimize cage-related bias. Lungs were homogenized in 1 ml

251 of PBS using a bead mill homogenizer (Tissue Lyser, Qiagen) and debris was pelleted by  
252 centrifugation (2,000 g, 5 min). Triplicate 10-fold serial dilutions of each supernatant were plated  
253 on ST6GalIMDCK cells (kindly provided by Dr. Y. Kawaoka, University of Wisconsin,  
254 Madison, WI) and titrated by plaque assays [29]. The investigator was blinded to group  
255 allocation.

256

### 257 **Viral infection in reconstituted human airway epithelium (HAE)**

258 MucilAir® HAE were obtained from Epithelix SARL (Geneva, Switzerland) and maintained in  
259 air-liquid interphase with specific culture medium in Costar Transwell inserts (Corning, NY,  
260 USA) according to manufacturer's instructions. For infection experiments, apical poles were  
261 gently washed with warm PBS and then infected with a 100- $\mu$ L dilution of influenza  
262 A/Lyon/969/09 (H1N1)pdm09 virus in OptiMEM medium (Gibco, ThermoFisher Scientific) at a  
263 MOI of 0.1. Basolateral pole sampling as well as 150- $\mu$ L OptiMEM apical washes were  
264 performed at the indicated time points, and then stored at -80 °C for PFU/mL and TCID<sub>50</sub>/mL  
265 viral titration. Treatments with specific dilutions of candidate molecules alone or combined with  
266 oseltamivir in MucilAir® culture medium were applied through basolateral poles. All treatments  
267 were initiated on day 0 (5 h after viral infection) and continued once daily for 5 consecutive days  
268 (5 drug administrations in total). Variations in transepithelial electrical resistance ( $\Delta$  TEER) were  
269 measured using a dedicated volt-ohm meter (EVOM2, Epithelial Volt/Ohm Meter for TEER)  
270 and expressed as Ohm/cm<sup>2</sup>.

271

### 272 **High throughput sequencing and bioinformatics analysis**

273 cDNA libraries were prepared from 200 ng of total RNA using the Scriptseq™ complete Gold  
274 kit-Low Input (SCL6EP, Epicentre), according to manufacturer's instructions. Each cDNA  
275 library was amplified and indexed with primers provided in the ScriptSeq™ Index PCR Primers  
276 kit (RSBC10948, Epicentre) and then sequenced as 100 bp paired-end reads. Prior to sequencing,  
277 libraries were quantified with QuBit and Bioanalyzer2100, and indexed libraries were pooled in  
278 equimolar concentrations. Sequencing was performed on an Illumina HiSeq 2500 system  
279 (Illumina, Carlsbad, CA), with a required minimum of 40 million reads sequenced per sample.  
280 Conversion and demultiplexing of reads was performed using bcl2fastq 1.8.4 (Illumina). The  
281 FastQC software (<http://www.bioinformatics.babraham.ac.uk/projects/fastqc>) was used for  
282 quality controls of the raw data. Reads were trimmed using the Trimmomatic [32] software, with  
283 a minimum quality threshold of Q30. Trimmed reads were pseudo-aligned to the *Homo sapiens*  
284 genome (GRCh38.p11) using the Kallisto software [33]. Statistical analysis was performed in  
285 R3.3.1 with the package EdgeR 3.14.0 [34]. Differential expression was calculated by comparing  
286 each condition to the mock using a linear model. The Benjamini-Hochberg procedure was used  
287 to control the false discovery rate (FDR). Transcripts with an absolute fold change >2 and a  
288 corrected p-value <0.05 were considered to be differentially expressed. Enriched pathways and  
289 GO terms were assessed with DAVID 6.8 [27]. For visualization purposes, a heatmap and  
290 stacked barplots were constructed in R3.3.1 on mean-weighted fold changes and association  
291 between conditions were assessed by Spearman correlation analysis.

292

### 293 **Statistical analysis**

294 All experimental assays were performed in duplicate at a minimum, and representative results  
295 are shown unless indicated otherwise. No statistical methods were used to predetermine sample

296 size in animal studies, which were estimated according to previous studies and the known  
297 variability of the assays. No mice were excluded from post-protocol analyses, the experimental  
298 unit was an individual animal and equal variance was assumed. Kaplan-Meier survival plots  
299 were compared by Log-Rank (Mantel-Cox) test and hazard ratios (HR) were computed by the  
300 Mantel-Haenszel method. Weight loss and viral titers of all groups were compared by one-way  
301 analysis of variance (ANOVA) with Tukey's multiple comparison post-test. The testing level ( $\alpha$ )  
302 was 0.05. Statistical analyses were performed on all available data, using GraphPad, Prism 7.

303

304



## 305 **Results**

306 **Generation of clinical virogenomic profiles.** We determined *in vivo* transcriptional signatures  
307 of infection from paired nasal wash samples of nine untreated patients, collected during acute  
308 A(H1N1)pdm09 pandemic influenza infection (“infected”) and at least three months later to  
309 ensure a recovery non-infected state (“cured”) [21]. The nine patients from whom transcriptomic  
310 data could be obtained constitute a representative sample of the whole studied cohort, except for  
311 the male sex ratio (**Table S1**). We combined two strategies to tackle the characteristic low RNA  
312 amount/quality of this type of clinical samples. Firstly, cRNA labelling was performed after a  
313 linear amplification of initial RNA, as previously described [35]. Secondly, raw signals obtained  
314 after hybridization of labelled cRNA on microarray and data acquisition were processed using  
315 the MAXRS algorithm [23] to overcome low hybridization conditions. This approach, initially  
316 developed for the analysis of heterologous hybridizations, takes advantage of the specific design  
317 of the Affymetrix® microarray used in our study, with several probes targeting the same locus  
318 [23].

319 After normalization, differentially expressed genes were selected based on two criteria: i) an  
320 absolute fold change  $>2$ , and ii) a Benjamini-Hochberg corrected p-value  $<0.05$ . We therefore  
321 identified a total of 1,117 commonly deregulated probes, with almost equal proportion of up-  
322 regulated (48.4%; n=541) and down-regulated probes (51.7%; n=576). Remarkably, despite  
323 considerable inter-patient variability among recovery state samples, a substantial homogenization  
324 of transcriptional profiles was observed in the context of infection, as shown in the heatmap  
325 presented in **Figure 1B** and by the median Spearman’s  $\rho$  correlation values for both groups (0.60  
326 “cured” vs. 0.90 “infected”). These virogenomic signatures of infection constituted the input for  
327 the subsequent *in silico* query for the identification of candidate compounds.

328

329 ***In silico* cross-analysis of chemogenomic versus virogenomic clinical profiles.** We then  
330 performed an *in-silico* search for molecules that reverse the virogenomic signature of infection,  
331 using the CMAP database (Build 02) as previously described [18]. CMAP is a collection of  
332 genome-wide transcriptional expression data from cultured human cells treated with bioactive  
333 small molecules. HG-U133plus2 probesets were mapped to the U133A probesets using the  
334 Ensembl BioMarts online tool [36, 37], and connectivity scores and p-values were obtained  
335 using the CMAP algorithm [19, 20]. With the global set of 1,000 most differentially expressed  
336 genes as input (**Figure 1C**, Main List), we obtained a preliminary list of 60 candidate  
337 compounds. In parallel, we used two other subsets of genes belonging to significantly enriched  
338 Gene Ontology (GO) terms obtained from microarray analyses to introduce functional bias and  
339 add more biological significance to our first screening. Hence, by using 6 Biological Process  
340 terms (GO\_BP) that shared more than 90% of genes (**Figure 1C**, Functional cross-analysis #1), a  
341 second list of 109 compound candidates was obtained. A third list of 19 compounds was  
342 obtained using 3 relevant Cellular Component terms (GO\_CC) (**Figure 1C**, Functional cross-  
343 analysis #2). The comparison of the 160 compounds from the three distinct lists (12.2% of  
344 compounds of CMAP, **Table S2**) highlighted monensin as the only common compound (**Figure**  
345 **1D**).

346 To rationally reduce the number of drug candidates, bioactive drugs were excluded if not  
347 compatible with a final use as antiviral, mostly for safety (e.g. teratogens, intercalating agents)  
348 and/or pharmacological (e.g. documented low bioavailability) reasons, based on clinical data and  
349 the PubMed/PubChem databases. Thus, the number of candidates was initially decreased to 139  
350 and then to 110 (**Figure S1**). We subsequently determined a shortlist of 35 bioactive molecules

351 (<3% of CMAP, **Table 1**) for *in vitro* screening, based on two main criteria: i) molecules  
352 representative of the different pharmacological classes identified, and ii) molecules evenly  
353 distributed in the three lists obtained after *in silico* screening (Main List, List #1 and List #2,  
354 **Figure 1D**), which comprise a panoply of documented pharmacological classes, including anti-  
355 fungal agents (e.g. monensin, flucytosine), anti-inflammatory agents (e.g. felbinac, apigenin,  
356 prednisone) and adrenergic agonists/antagonists (timolol, methoxamine, tolazoline), as  
357 represented in the Venn diagram (**Figure 1D, Table 1**). Interestingly, at least 14 (40%)  
358 molecules from our short-list belong to a pharmacological class related with anti-microbial or  
359 anti-inflammatory activities (**Table 1, #**), and 11 (31.4%) have already been reported in the  
360 literature for their antiviral properties against influenza or other viruses (**Table 1, \***), notably the  
361 nucleoside inhibitor ribavirin [38, 39] and the ionophore monensin [40].

362

363 **Inhibitory effect of the selected molecules on A(H1N1)pdm09 viral growth *in vitro*.** *In vitro*  
364 screening of the antiviral potency of the 35 selected molecules was performed in A549 human  
365 lung epithelial cells seeded in 6-well plates. Firstly, we evaluated the impact of 6 h pre-treatment  
366 with a 10-fold drug concentration range, using the original CMAP concentration as reference.  
367 Six hours after treatment, cells were washed and infected with influenza A(H1N1)pdm09 virus at  
368 a multiplicity of infection (MOI) of 0.1. Viral titers in supernatants collected from treated  
369 samples at 48 h post infection (p.i.) were normalized with those measured in mock-treated  
370 controls ( $>10^5$  TCID<sub>50</sub>/mL). Potential treatment-induced cell toxicity was evaluated in the same  
371 experimental conditions using the MTS assay and expressed also as the percentage of cell  
372 viability compared to non-infected controls (**Figure 2**). Based on antiviral activity and cell  
373 viability profiles obtained (**Figure 2A**, blue triangles), we defined as “inhibitors” compounds

374 that fulfilled the following two criteria: i) induce >75% reduction on viral production, and ii)  
375 have minor impact on cell viability, with relative values in the 90%-110% range (**Figure 2A**,  
376 squares in **left panels** and zooms in **right panels**). A total of 10 compounds (28.6%) matched  
377 both criteria, mainly when used at a 10-fold CMAP concentration (**Figure 2B**), yet only a limited  
378 number of them exhibited classic dose-dependent inhibition. Whenever possible, as in the case of  
379 monensin or ranitidine for example, EC50 values were calculated, which were mostly in the  
380 micromolar range (**Figure 2B**).

381 In a second round of screening, we tested the same 6 h pre-treatment but with serial 10-fold  
382 dilutions from the initial CMAP concentration to CMAP/10,000, followed by one additional  
383 treatment immediately after infection (**Figure 2A**, green circles in **left and right panels**). In  
384 these conditions, 30 compounds (85.7%) met our criteria to be considered as inhibitors of viral  
385 production (**Figure 2C**), with half of them showing a classic dose-dependent inhibition effect.  
386 Calculated EC50 values were in the nanomolar range and hence significantly lower than those  
387 calculated in the context of pre-treatment only. Dose response curves and calculated EC50 for all  
388 the 35 compounds are presented in **Figure S2** and **Table S3**, respectively.

389

390 **Efficacy of selected molecules for the treatment of influenza A(H1N1)pdm09 virus infection**  
391 **in mice.** Based on EC50 and cytotoxicity data from the *in vitro* screening, we selected 8 molecules  
392 to investigate their potential as inhibitors of influenza A(H1N1)pdm09 in C57BL/6 mice.  
393 Oseltamivir, the standard antiviral for the treatment of influenza infections was used as control.  
394 All treatments were performed *per os*, starting 6 h before infection and being continued once  
395 daily for 5 consecutive days (5 drug administrations in total) (**Figure 3**). While animals treated  
396 with oseltamivir or monensin showed clinical improvement compared to the saline (placebo)

397 group in terms of survival and weight loss (oseltamivir only), treatment with Lanatoside C,  
398 prednisolone, flucytosine, felbinac and timolol showed no clinical benefit at the selected  
399 concentrations (**Figure S5A**). In contrast, diltiazem and etilefrine not only significantly  
400 improved survival and maximum mean weight losses (**Figure 3A-B**), but also showed at least 1-  
401 log reductions in lung viral titers (LVTs) on day 5 p.i. (**Figure 3C**). Importantly, no signs of  
402 toxicity were observed for any of the drugs at the regimens tested (**Figure S3B**).

403

404 **Diltiazem retains its *in vivo* efficacy when administered 24 h after viral infection.** To best  
405 mimic the therapeutic setting, we next evaluated the efficacy of the same 5-day oral regimen  
406 with diltiazem or etilefrine but when initiated 24 h after viral infection (**Figure 4**). As with  
407 oseltamivir and monensin, diltiazem treatment completely prevented mortality and reduced  
408 weight loss in influenza A(H1N1)pdm09 infected mice, which otherwise showed only 50%  
409 (5/10) survival for the etilefrine and saline groups (**Figure 4A-B**). Interestingly, 1- to 1.5-log  
410 reductions in LVTs compared to the saline group were observed at day 5 in groups of mice  
411 treated with diltiazem or etilefrine (**Figure 4C**). We then used a more stringent approach by  
412 increasing the viral inoculum to evaluate the same delayed (24 h post infection) 5-day diltiazem  
413 regimen in the context of a 100% lethal A(H1N1)pdm09 infection (**Figure 4D-F**). Whereas  
414 treatment with oseltamivir and diltiazem successfully rescued 40% (4/10) and 20% (2/10) of  
415 mice, respectively, half-dose treatment with diltiazem (45 mg/kg) rescued 30% (3/10) of mice  
416 from death, also showing significant improvement in mean weight loss (**Figure 4D-E**).  
417 Calculated hazard ratios (HR) for the saline group compared to these three treatment groups were  
418 8.41 (CI95: 1.65-43.02), 2.85 (0.56-14.47) and 7.62 (1.49-38.96), respectively. Noteworthy,  
419 LVTs at day 5 p.i. were comparable among all treated and untreated groups (**Figure 4F**),

420 suggesting mainly a protective effect of diltiazem towards severe influenza infection rather than  
421 a direct role in decreasing viral production.

422

423 **Diltiazem significantly reduces viral replication in infected reconstituted human airway**  
424 **epithelia (HAE).** To further complement *in vivo* data, we characterized the inhibitory properties  
425 of diltiazem using a biologically relevant reconstituted airway epithelium model, derived from  
426 human primary bronchial cells (MucilAir®, Epithelix). HAE were infected with influenza  
427 A(H1N1)pdm09 at a MOI of 0.1, and treatments on the basolateral medium were initiated 5 h p.i.  
428 and continued once daily for 5 consecutive days. In the absence of treatment, viral replication at  
429 the apical surface peaked at 48 h p.i. ( $\sim 1 \times 10^8$  PFU/ml) and was detectable at important levels  
430 for at least 7 days. As expected, trans-epithelial electrical resistance (TEER) values, measuring  
431 tight junction and cell layer integrity, sharply decreased and bottomed out at 72 h p.i. in the  
432 untreated control, correlating with the first virus detection on the basolateral medium (**Figure 5A**  
433 **and Table S6**). A similar pattern was observed in infected HAE treated with oseltamivir 0.1  $\mu$ M  
434 or diltiazem 9  $\mu$ M (CMAP), which conferred no significant advantage over the untreated control.  
435 Conversely, oseltamivir 1  $\mu$ M and diltiazem 90  $\mu$ M treatments (10-fold CMAP) strongly  
436 inhibited viral replication, delaying the peak of viral production by 24 h. Both treatments induced  
437 >3-log reductions in apical viral titers at 48 h p.i. compared to the untreated control, and >2-log  
438 reductions when comparing peak titers (48 h p.i. untreated vs. 72 h p.i. treated). Moreover,  
439 whereas oseltamivir treatment stabilized TEER during the time-course of infection, diltiazem  
440 treatment partially buffered the TEER decrease observed in the untreated control (**Figure 5A** and  
441 **Table S6**). No virus was detected on the basolateral medium for these two treated groups, and  
442 absence of treatment-induced toxicity was confirmed by measuring the release of intracellular

443 lactate dehydrogenase (LDH). Interestingly, we observed that inhibitory and protective  
444 properties demonstrated by diltiazem were progressively reversible when basolateral medium  
445 was replaced with fresh medium without drugs. Overall, these results are in accordance and  
446 strongly support the inhibitory and protective effects of diltiazem observed *in vitro* and in mice,  
447 respectively.

448

449 **Diltiazem-oseltamivir combination confers improved efficacy when compared to**  
450 **monotherapy in infected HAE.** We anticipated that the combination of two antiviral  
451 compounds that target different viral/cellular determinants could induce better virological and  
452 physiological responses when compared to antiviral monotherapy. We therefore evaluated the  
453 diltiazem-oseltamivir combination in the same conditions described above, notably a 5-day  
454 treatment course with treatment initiation at 5 h p.i. The diltiazem 90  $\mu\text{M}$  / oseltamivir 1  $\mu\text{M}$   
455 combination conferred >3-log reduction in apical peak viral titers when compared to the  
456 untreated control, even greater than that observed with same dose monotherapy. TEER values  
457 remained stable during combined treatment, comparable to those observed with oseltamivir 1  
458  $\mu\text{M}$  monotherapy (**Figure 5B** and **Table S6**). Remarkably, although not effective as  
459 monotherapy in the low concentrations tested above, the diltiazem 9  $\mu\text{M}$  / oseltamivir 0.1  $\mu\text{M}$   
460 combination contrariwise delayed the peak of viral production, significantly reduced apical viral  
461 titers, and slightly buffered TEER values compared to the untreated control (**Figure 5B** and  
462 **Table S6**). Once again, no treatment-related toxicity was observed for any of the combinations  
463 tested. These results plead in favor of the potential of diltiazem for the improvement of current  
464 anti-influenza therapy with neuraminidase inhibitors.

465

466 **Diltiazem treatment induces a significant reversion of the viral infection signature.** Since  
467 the rationale behind our approach relies on attaining antiviral activity through a drug-induced  
468 global and multi-level inversion of the infection signature, we advantageously used the  
469 MucilAir® HAE model coupled with high-throughput sequencing in order to characterize and  
470 compare the specific transcriptional signatures induced by infection and/or diltiazem treatment  
471 (**Figures 6 and S4**). HAE were mock-infected or infected with influenza A(H1N1)pdm09 virus  
472 and then mock-treated or treated in the same experimental conditions in which the antiviral effect  
473 of diltiazem has been previously validated (MOI of 0.1, 90  $\mu$ M diltiazem). At 72 h p.i., cells  
474 were lysed and total RNA was extracted. cDNA libraries were then produced, amplified, and  
475 subjected to high-throughput sequencing. Taking the mock-infected / mock-treated (“mock”) as  
476 baseline, we initially performed DAVID functional gene enrichment (absolute fold change >2,  
477 Benjamini-Hochberg corrected p-value <0.05) on the specific transcriptional signature of  
478 diltiazem with the objective of gaining insight on the putative host pathways involved in its  
479 antiviral effect. The lists of up-regulated (n=194) and down-regulated (n=110) transcripts in the  
480 mock-infected / diltiazem (“mock + diltiazem”) condition were analyzed using DAVID 6.8 to  
481 highlight associations with specific GO terms. Although no enriched BP was identified among  
482 down-regulated transcripts, the list of up-regulated transcripts associated with diltiazem  
483 treatment highlighted 7 particularly enriched BP. While 4 of these BP (GO:0009615;  
484 GO:0045071; GO:0051607; GO:0060337) are directly linked to antiviral response/cellular  
485 response to virus, the remaining 3 (GO:0055114; GO:0008299; GO:0006695) are involved in  
486 cholesterol biosynthesis/metabolism (**Figure 6A**). We then compared the common differentially  
487 expressed transcript levels between the three infection/treatment conditions. These  
488 transcriptional signatures revealed a marked anti-correlated profile between the “mock +



489 diltiazem” and the infected / mock-treated (“H1N1”) conditions (**Figure 6B**), supported by a  
490 median Spearman’s  $\rho$  correlation value of -0.82 (**Figure 6C**). Most important, the infected /  
491 diltiazem (“H1N1 + diltiazem”) condition yielded  $\rho$  correlation values of 0.40 and -0.72 when  
492 compared to either “mock + diltiazem” or “H1N1”, respectively, therefore confirming a partial  
493 reversion of the infection virogenomic signature during effective antiviral treatment with  
494 diltiazem (**Figures 6D and S4**), as expected.

495

496

## 497 **Discussion**

498 The existing urge for alternative strategies to cope with the limited efficacy of currently  
499 approved antivirals for the prevention and treatment of influenza infections [2, 41, 42], mostly in  
500 the case of patients with severe influenza and acute respiratory distress syndrome (ARDS) [43,  
501 44], represented the central driving force of this study. Here, we developed and validated for the  
502 first time an innovative approach based on clinical genomic signatures of respiratory viral  
503 infections for the rapid discovery, *in vitro*, *in vivo* and *ex-vivo* evaluation, as well as the  
504 repurposing of FDA-approved drugs for their newly identified host-targeted inhibitory and  
505 protective properties against influenza infections.

506 Targeting host components on which viral replication depends instead of viral determinants  
507 represents a real change of paradigm in antiviral development, with pioneering results mainly  
508 observed in the context of antiretroviral therapy [13, 45]. Nevertheless, and despite strong  
509 putative advantages such as the achievement of broad-spectrum antiviral efficacy and the  
510 minimization of viral drug resistance, this approach usually fails to overcome two major limiting  
511 factors of classic compound screening. Firstly, it remains target-centered *per se*, therefore  
512 leading to the identification of drugs with limited efficacy due to the complex network and high  
513 redundancy of the host cellular pathways. Secondly, the need of high-throughput screenings  
514 often entails the measurement of a very limited number of viral parameters, usually in non-  
515 physiologically and hence poorly relevant conditions and/or cellular models.

516 Based on our initial proof-of-concept study on the *in silico* screening of the CMAP database [19,  
517 20] with no initial *a priori* on specific host targets [18], we moved our approach up to the clinical  
518 trial setting, by determining exploitable and more relevant virogenomic profiles directly from

519 standard clinical samples of influenza-infected patients. Since the low amount of often degraded  
520 RNA obtained from these samples represented a major challenge, we implemented an original  
521 combination of sample preparation techniques for low input but high quality samples with data  
522 processing initially designed for expression analysis of non-model species [22, 23].

523 Another substantial development was the integration of several lists of candidate molecules  
524 issued from different transcriptomic signatures with enriched relevant DAVID Gene Ontology  
525 terms, and their final selection based on their pharmacological classes and potential compatibility  
526 as antivirals. Our refined strategy allowed the selection of a shortlist of 35 high potential  
527 candidates out of a rationalized computational screening of a total of 1,309 FDA-approved  
528 bioactive molecules. This drastic positive selection step constituted a major advantage, since it  
529 enabled the implementation of relevant and integrated *in vitro*, *in vivo* and *ex-vivo* evaluations in  
530 a time- and cost-effective manner. Most important, the use of patient (*in vivo*) virogenomic  
531 profiles led to the identification of molecules with highly improved *in vitro* activity and  
532 significant *in vivo* antiviral efficacy as compared with compounds previously obtained from our  
533 initial study based on cell culture (*in vitro*) virogenomic profiles [18]. These results truly  
534 highlight the added value of using relevant clinical virogenomic signatures to optimize the  
535 computational screening for active drugs.

536 Two of the molecules identified in this study with transcriptomic profiles that counteract clinical  
537 virogenomic signatures (e.g. ribavirin and monensin) have already been validated for their anti-  
538 influenza properties [38, 40], and then supported the relevance of our compound selection  
539 strategy. Nevertheless, although different modes of action have been postulated for the anti-  
540 influenza activity of the synthetic guanosine analog ribavirin [39], the exact mechanisms remain  
541 uncharacterized so far. Similarly, it has been postulated that monensin, an antibiotic isolated

542 from *Streptomyces spp*, may have a role as a ionophore that interferes with intracellular transport  
543 of several enveloped viruses, including influenza [40]. In that sense, even if we cannot rule out  
544 that some of the molecules identified *in silico* exert a direct effect on a specific pathway or  
545 cellular target, the fact that these molecules have been identified with a high anti-correlation rate  
546 in CMAP strongly supports a potential multi-target inhibitory effect, probably resulting in deep  
547 modifications of host gene expression. In fact, both monensin and ribavirin were previously  
548 reported to modulate the host cellular gene expression profile, notably through the up-regulation  
549 of the cholesterol and lipid biosynthesis genes [46] or the virus-induced ISRE signaling and  
550 antiviral ISGs genes [47], respectively.

551 The two most promising molecules highlighted in this study are etilefrine, an alpha and beta-  
552 adrenergic receptor agonist, currently indicated as a cardiogenic and anti-hypotensive agent [48]  
553 and mainly diltiazem, a voltage-gated Ca<sup>2+</sup> channel antagonist that is currently used to control  
554 angina pectoris and cardiac arrhythmia [49]. In addition to their strong inhibitory effect on the  
555 viral growth of circulating A(H1N1)pdm09 viruses, with *in vitro* EC50 values in the nanomolar  
556 range (**Figure 2**), both molecules also demonstrated antiviral properties against oseltamivir-  
557 resistant A(H1N1)pdm09 and prototype H3N2 and B influenza strains (**Table S4**). Our *in vivo*  
558 results (**Figures 3-4**), obtained without previous treatment optimization in terms of dosage or  
559 administration route, also suggest that these drugs harbor a protective role towards influenza  
560 infection, particularly in the case of diltiazem, which conferred increased survival in mice even  
561 in a model of severe influenza infection (**Figure 4D-F**). Moreover, the inhibitory and protective  
562 properties of diltiazem were validated in the reconstituted human airway epithelium model, also  
563 showing enhanced efficacy when combined with oseltamivir (**Figure 5**).

564 Finally, a very recent study by Fujioka and colleagues [50] confirmed the antiviral activity of  
565 diltiazem anticipated by our approach. In that study, based on the role of Ca<sup>2+</sup> channels on the  
566 attachment of influenza viruses to the host cell, the authors discuss whether the diltiazem  
567 induced modulation of Ca<sup>2+</sup> channel activity might not fully explain such observed antiviral  
568 activity, consistent with a multi-level (off-target) effect of diltiazem. In this context, in which not  
569 all Ca<sup>2+</sup> channel inhibitors confer significant antiviral activity, the newly described capacity of  
570 diltiazem to partially reverse the global virogenomic signature of infection and modulate specific  
571 genes related to the host antiviral response and cholesterol metabolism (**Figures 6 and S4**)  
572 suggests a putative explanation for its inhibitory effect observed *in vitro*, *ex vivo* and in mice.  
573 Nevertheless, further investigations are underscored to shed light on the specific mechanisms  
574 underlying such potential multi-level mode of action of diltiazem.

575

## 576 **Conclusions**

577 Overall, the results presented here set a solid baseline for our drug repurposing strategy and for  
578 the use of diltiazem as a host-targeted antiviral in clinical practice. Moreover, the increased  
579 antiviral efficacy observed in reconstituted human airway epithelium (**Figures 5B and S6 Table**)  
580 plead in favor of the combination of diltiazem with the virus-targeted antiviral oseltamivir for the  
581 improvement of current anti-influenza therapy, and possibly decreasing the risk of development  
582 of viral resistance. In that regard, our results prompted a French multicenter randomized clinical  
583 trial aimed at assessing the effect of diltiazem-oseltamivir bitherapy compared with standard  
584 oseltamivir monotherapy for the treatment of severe influenza infections in intensive care units,  
585 hence completing the bedside-to-bench and bench-to-bedside cycle of our innovative approach.  
586 Additionally, retrospective signature analysis of sequential respiratory samples from patients

587 included in both study arms and stratified according to their clinical response to treatment will  
588 provide valuable data to pursue the investigations on the specific mediators of the diltiazem-  
589 related antiviral response. This trial (FLUNEXT TRIAL PHRC #15-0442, ClinicalTrials.gov  
590 identifier NCT03212716) is currently ongoing.

591 Finally, our study underscores the high value of clinical specimens and the advantages of  
592 exploiting virogenomic and chemogenomic data for the successful systematic repurposing of  
593 drugs already available in our modern pharmacopeia as new effective antivirals. We propose that  
594 our approach targeting respiratory epithelial cells, the principal influenza infected cell type in the  
595 lung, could be extended to other respiratory viruses and eventually to other pathogens involved  
596 in acute infections. Importantly, drug repurposing presents several financial and regulatory  
597 advantages compared to the development of *de novo* molecules [5], which are of particular  
598 interest not only in the context of antimicrobial resistance but also against both emerging or  
599 recurrent pathogens for which we are still disarmed.

600

601 **Declarations**

602

603 **Ethics approval and consent to participate:** Adult patients were recruited by general  
604 practitioners in the context of a previously published randomized clinical trial (Escuret et al.,  
605 2012) (ClinicalTrials.gov identifier NCT00830323) and all of them provided written informed  
606 consent. The study protocol was approved by the Lyon Ethics Committee (Comité de Protection  
607 des Personnes Lyon B) on September 9th, 2009 and conducted in accordance with the  
608 Declaration of Helsinki.

609 All animal procedures were approved by the Institutional Animal Care Committee of the Centre  
610 Hospitalier Universitaire de Québec (CPAC protocol authorization #2012-068-3) according to  
611 the guidelines of the Canadian Council on Animal Care.

612 **Consent for publication:** Not applicable.

613 **Availability of data and material:** The main datasets supporting the conclusions of this article  
614 are included within the article and its additional files. All raw microarray data from virogenomic  
615 signatures were deposited on the National Center for Biotechnology Information's Gene  
616 Expression Omnibus (GEO), under accession number GSE93731. Other datasets used and/or  
617 analyzed during the current study are available from the corresponding authors on reasonable  
618 request.

619 **Competing interests:** AP, OT, JT, GB and MRC are co-inventors of a patent application filed by  
620 INSERM, Université Claude Bernard Lyon 1, Laval University and Hospices Civils de Lyon for  
621 the repurposing of diltiazem and etilefrine as anti-influenza agents (FR15/52284 -  
622 PCT/ep2016/056036 - WO2016146836). The authors have no additional financial interests.

623 **Funding:** This work was funded by grants from the French Ministry of Social Affairs and Health  
624 (DGOS), Institut National de la Santé et de la Recherche Médicale (INSERM), the Université  
625 Claude Bernard Lyon 1, the Région Auvergne Rhône-Alpes (CMIRA N° 14007029 and  
626 AccueilPro COOPERA N°15458 grants), and Canadian Institutes of Health Research (N°  
627 229733 and 230187). Guy Boivin is the holder of the Canada Research Chair on influenza and  
628 other respiratory viruses. Funding institutions had no participation in the design of the study,  
629 collection, analysis and interpretation of data, or in the writing of the manuscript.

630 **Authors' contributions:** AP, OT, JT, GB and MRC designed and coordinated the study. VE, JP  
631 and BL acquired clinical data from the cohort. AP, OT, TJ, BP, AT, MR, MEH, CR, CNL, SC,  
632 CLL and JT performed experiments and provided technical support. AP, OT, MR, JP, JT, GB  
633 and MRC interpreted data. AP, OT and MRC wrote the manuscript. JT, GB and MRC revised  
634 the manuscript.

635 **Acknowledgements:** The authors want to thank Jacques Corbeil and Frederic Raymond  
636 (Research Center in Infectious Diseases of the CHU de Quebec and Laval University, Quebec)  
637 for their help and useful advice.

638



## 639 **References**

- 640 1. Influenza facts Sheet n°211. 2014. <http://www.who.int/mediacentre/factsheets/fs211/en/>.  
641 Accessed 20 Jan 2016.
- 642 2. Loregian A, Mercorelli B, Nannetti G, Compagnin C, Palù G. Antiviral strategies against  
643 influenza virus: towards new therapeutic approaches. *Cell Mol Life Sci CMLS*. 2014;71:3659–  
644 83.
- 645 3. Booth B, Zimmel R. Prospects for productivity. *Nat Rev Drug Discov*. 2004;3:451–6.
- 646 4. Ashburn TT, Thor KB. Drug repositioning: identifying and developing new uses for existing  
647 drugs. *Nat Rev Drug Discov*. 2004;3:673–83.
- 648 5. Law GL, Tisoncik-Go J, Korth MJ, Katze MG. Drug repurposing: a better approach for  
649 infectious disease drug discovery? *Curr Opin Immunol*. 2013;25:588–92.
- 650 6. Johansen LM, DeWald LE, Shoemaker CJ, Hoffstrom BG, Lear-Rooney CM, Stossel A, et al.  
651 A screen of approved drugs and molecular probes identifies therapeutics with anti-Ebola virus  
652 activity. *Sci Transl Med*. 2015;7:290ra89.
- 653 7. Xu M, Lee EM, Wen Z, Cheng Y, Huang W-K, Qian X, et al. Identification of small-molecule  
654 inhibitors of Zika virus infection and induced neural cell death via a drug repurposing screen.  
655 *Nat Med*. 2016;22:1101–7.
- 656 8. Naylor S, Schonfeld JM. Therapeutic drug repurposing, repositioning and rescue - Part I:  
657 Overview. *Drug Discov World*. 2014;16.  
658 [https://www.researchgate.net/publication/286670692\\_Therapeutic\\_drug\\_repurposing\\_repositioning\\_and\\_rescue\\_-\\_Part\\_I\\_Overview](https://www.researchgate.net/publication/286670692_Therapeutic_drug_repurposing_repositioning_and_rescue_-_Part_I_Overview). Accessed 11 Jan 2017.  
659
- 660 9. Keiser MJ, Setola V, Irwin JJ, Laggner C, Abbas AI, Hufeisen SJ, et al. Predicting new  
661 molecular targets for known drugs. *Nature*. 2009;462:175–81.
- 662 10. Haupt VJ, Schroeder M. Old friends in new guise: repositioning of known drugs with  
663 structural bioinformatics. *Brief Bioinform*. 2011;12:312–26.
- 664 11. Li Y, Agarwal P. A pathway-based view of human diseases and disease relationships. *PLoS*  
665 *One*. 2009;4:e4346.
- 666 12. Lussier YA, Chen JL. The emergence of genome-based drug repositioning. *Sci Transl Med*.  
667 2011;3:96ps35.
- 668 13. Hütter G, Bodor J, Ledger S, Boyd M, Millington M, Tsie M, et al. CCR5 Targeted Cell  
669 Therapy for HIV and Prevention of Viral Escape. *Viruses*. 2015;7:4186–203.
- 670 14. Ludwig S. Disruption of virus-host cell interactions and cell signaling pathways as an anti-  
671 viral approach against influenza virus infections. *Biol Chem*. 2011;392:837–47.

- 672 15. Rossignol JF, La Frazia S, Chiappa L, Ciucci A, Santoro MG. Thiazolidines, a new class of  
673 anti-influenza molecules targeting viral hemagglutinin at the post-translational level. *J Biol*  
674 *Chem.* 2009;284:29798–808.
- 675 16. Belser JA, Lu X, Szretter KJ, Jin X, Aschenbrenner LM, Lee A, et al. DAS181, a novel  
676 sialidase fusion protein, protects mice from lethal avian influenza H5N1 virus infection. *J Infect*  
677 *Dis.* 2007;196:1493–9.
- 678 17. Mazur I, Wurzer WJ, Ehrhardt C, Pleschka S, Puthavathana P, Silberzahn T, et al.  
679 Acetylsalicylic acid (ASA) blocks influenza virus propagation via its NF-kappaB-inhibiting  
680 activity. *Cell Microbiol.* 2007;9:1683–94.
- 681 18. Josset L, Textoris J, Loriod B, Ferraris O, Moules V, Lina B, et al. Gene expression  
682 signature-based screening identifies new broadly effective influenza a antivirals. *PloS One.*  
683 2010;5.
- 684 19. Lamb J, Crawford ED, Peck D, Modell JW, Blat IC, Wrobel MJ, et al. The Connectivity  
685 Map: using gene-expression signatures to connect small molecules, genes, and disease. *Science.*  
686 2006;313:1929–35.
- 687 20. Lamb J. The Connectivity Map: a new tool for biomedical research. *Nat Rev Cancer.*  
688 2007;7:54–60.
- 689 21. Escuret V, Cornu C, Boutitie F, Enouf V, Mosnier A, Bouscambert-Duchamp M, et al.  
690 Oseltamivir-zanamivir bitherapy compared to oseltamivir monotherapy in the treatment of  
691 pandemic 2009 influenza A(H1N1) virus infections. *Antiviral Res.* 2012;96:130–7.
- 692 22. Khaznadar Z, Boissel N, Agaugué S, Henry G, Cheok M, Vignon M, et al. Defective NK  
693 Cells in Acute Myeloid Leukemia Patients at Diagnosis Are Associated with Blast  
694 Transcriptional Signatures of Immune Evasion. *J Immunol Baltim Md 1950.* 2015;195:2580–90.
- 695 23. Degletagne C, Keime C, Rey B, de Dinechin M, Forcheron F, Chuchana P, et al.  
696 Transcriptome analysis in non-model species: a new method for the analysis of heterologous  
697 hybridization on microarrays. *BMC Genomics.* 2010;11:344.
- 698 24. Tukey J, Wilder J. *Exploratory Data Analysis.* Addison-Wesley; 1977.
- 699 25. Benjamini Y, Hochberg Y. Controlling the False Discovery Rate: A Practical and Powerful  
700 Approach to Multiple Testing. *J R Stat Soc Ser B Methodol.* 1995;57:289–300.
- 701 26. Barrett T, Edgar R. Gene expression omnibus: microarray data storage, submission, retrieval,  
702 and analysis. *Methods Enzymol.* 2006;411:352–69.
- 703 27. Dennis G Jr, Sherman BT, Hosack DA, Yang J, Gao W, Lane HC, et al. DAVID: Database  
704 for Annotation, Visualization, and Integrated Discovery. *Genome Biol.* 2003;4:P3.
- 705 28. Ashburner M, Ball CA, Blake JA, Botstein D, Butler H, Cherry JM, et al. Gene ontology:  
706 tool for the unification of biology. The Gene Ontology Consortium. *Nat Genet.* 2000;25:25–9.

- 707 29. Hatakeyama S, Sakai-Tagawa Y, Kiso M, Goto H, Kawakami C, Mitamura K, et al.  
708 Enhanced expression of an alpha2,6-linked sialic acid on MDCK cells improves isolation of  
709 human influenza viruses and evaluation of their sensitivity to a neuraminidase inhibitor. *J Clin*  
710 *Microbiol.* 2005;43:4139–46.
- 711 30. Moules V, Ferraris O, Terrier O, Giudice E, Yver M, Rolland JP, et al. In vitro  
712 characterization of naturally occurring influenza H3NA- viruses lacking the NA gene segment:  
713 toward a new mechanism of viral resistance? *Virology.* 2010;404:215–24.
- 714 31. Tsai AW, McNeil CF, Leeman JR, Bennett HB, Nti-Addae K, Huang C, et al. Novel Ranking  
715 System for Identifying Efficacious Anti-Influenza Virus PB2 Inhibitors. *Antimicrob Agents*  
716 *Chemother.* 2015;59:6007–16.
- 717 32. Bolger AM, Lohse M, Usadel B. Trimmomatic: a flexible trimmer for Illumina sequence  
718 data. *Bioinforma Oxf Engl.* 2014;30:2114–20.
- 719 33. Bray NL, Pimentel H, Melsted P, Pachter L. Near-optimal probabilistic RNA-seq  
720 quantification. *Nat Biotechnol.* 2016;34:525–7.
- 721 34. Robinson MD, McCarthy DJ, Smyth GK. edgeR: a Bioconductor package for differential  
722 expression analysis of digital gene expression data. *Bioinforma Oxf Engl.* 2010;26:139–40.
- 723 35. Dupinay T, Nguyen A, Croze S, Barbet F, Rey C, Mavingui P, et al. Next-generation  
724 sequencing of ultra-low copy samples: From clinical FFPE samples to single-cell sequencing.  
725 *Curr Top Virol.* 2013;10:63–83.
- 726 36. Kinsella RJ, Kähäri A, Haider S, Zamora J, Proctor G, Spudich G, et al. Ensembl BioMarts: a  
727 hub for data retrieval across taxonomic space. *Database J Biol Databases Curation.*  
728 2011;2011:bar030.
- 729 37. Flicek P, Amode MR, Barrell D, Beal K, Billis K, Brent S, et al. Ensembl 2014. *Nucleic*  
730 *Acids Res.* 2014;42 Database issue:D749-755.
- 731 38. Durr FE, Lindh HF. Efficacy of ribavirin against influenza virus in tissue culture and in mice.  
732 *Ann N Y Acad Sci.* 1975;255:366–71.
- 733 39. Leyssen P, De Clercq E, Neyts J. Molecular strategies to inhibit the replication of RNA  
734 viruses. *Antiviral Res.* 2008;78:9–25.
- 735 40. Alonso FV, Compans RW. Differential effect of monensin on enveloped viruses that form at  
736 distinct plasma membrane domains. *J Cell Biol.* 1981;89:700–5.
- 737 41. Hayden F. Developing new antiviral agents for influenza treatment: what does the future  
738 hold? *Clin Infect Dis Off Publ Infect Dis Soc Am.* 2009;48 Suppl 1:S3-13.
- 739 42. Lee SM-Y, Yen H-L. Targeting the host or the virus: current and novel concepts for antiviral  
740 approaches against influenza virus infection. *Antiviral Res.* 2012;96:391–404.

- 741 43. Koh Y. Update in acute respiratory distress syndrome. *J Intensive Care*. 2014;2:2.
- 742 44. Poissy J, Terrier O, Lina B, Textoris J, Rosa-Calatrava M. La modulation de la signature  
743 transcriptomique de l'hôte infecté : une nouvelle stratégie thérapeutique dans les viroses graves ?  
744 Exemple de la grippe. *Réanimation*. 2016;25:53–61.
- 745 45. Lou Z, Sun Y, Rao Z. Current progress in antiviral strategies. *Trends Pharmacol Sci*.  
746 2014;35:86–102.
- 747 46. Dayekh K, Johnson-Obaseki S, Corsten M, Villeneuve PJ, Sekhon HS, Weberpals JI, et al.  
748 Monensin inhibits epidermal growth factor receptor trafficking and activation: synergistic  
749 cytotoxicity in combination with EGFR inhibitors. *Mol Cancer Ther*. 2014;13:2559–71.
- 750 47. Zhang Y, Jamaluddin M, Wang S, Tian B, Garofalo RP, Casola A, et al. Ribavirin treatment  
751 up-regulates antiviral gene expression via the interferon-stimulated response element in  
752 respiratory syncytial virus-infected epithelial cells. *J Virol*. 2003;77:5933–47.
- 753 48. Pubchem C10H15NO2. Etilefrine | C10H15NO2 - PubChem.  
754 <https://pubchem.ncbi.nlm.nih.gov/compound/Etilefrine>. Accessed 3 Feb 2017.
- 755 49. Pubchem C22H26N2O4S. diltiazem | C22H26N2O4S - PubChem.  
756 <https://pubchem.ncbi.nlm.nih.gov/compound/diltiazem>. Accessed 3 Feb 2017.
- 757 50. Fujioka Y, Nishide S, Ose T, Suzuki T, Kato I, Fukuhara H, et al. A Sialylated Voltage-  
758 Dependent Ca<sup>2+</sup> Channel Binds Hemagglutinin and Mediates Influenza A Virus Entry into  
759 Mammalian Cells. *Cell Host Microbe*. 2018;23:809-818.e5.

760 **27/08/2018 14:49:00**

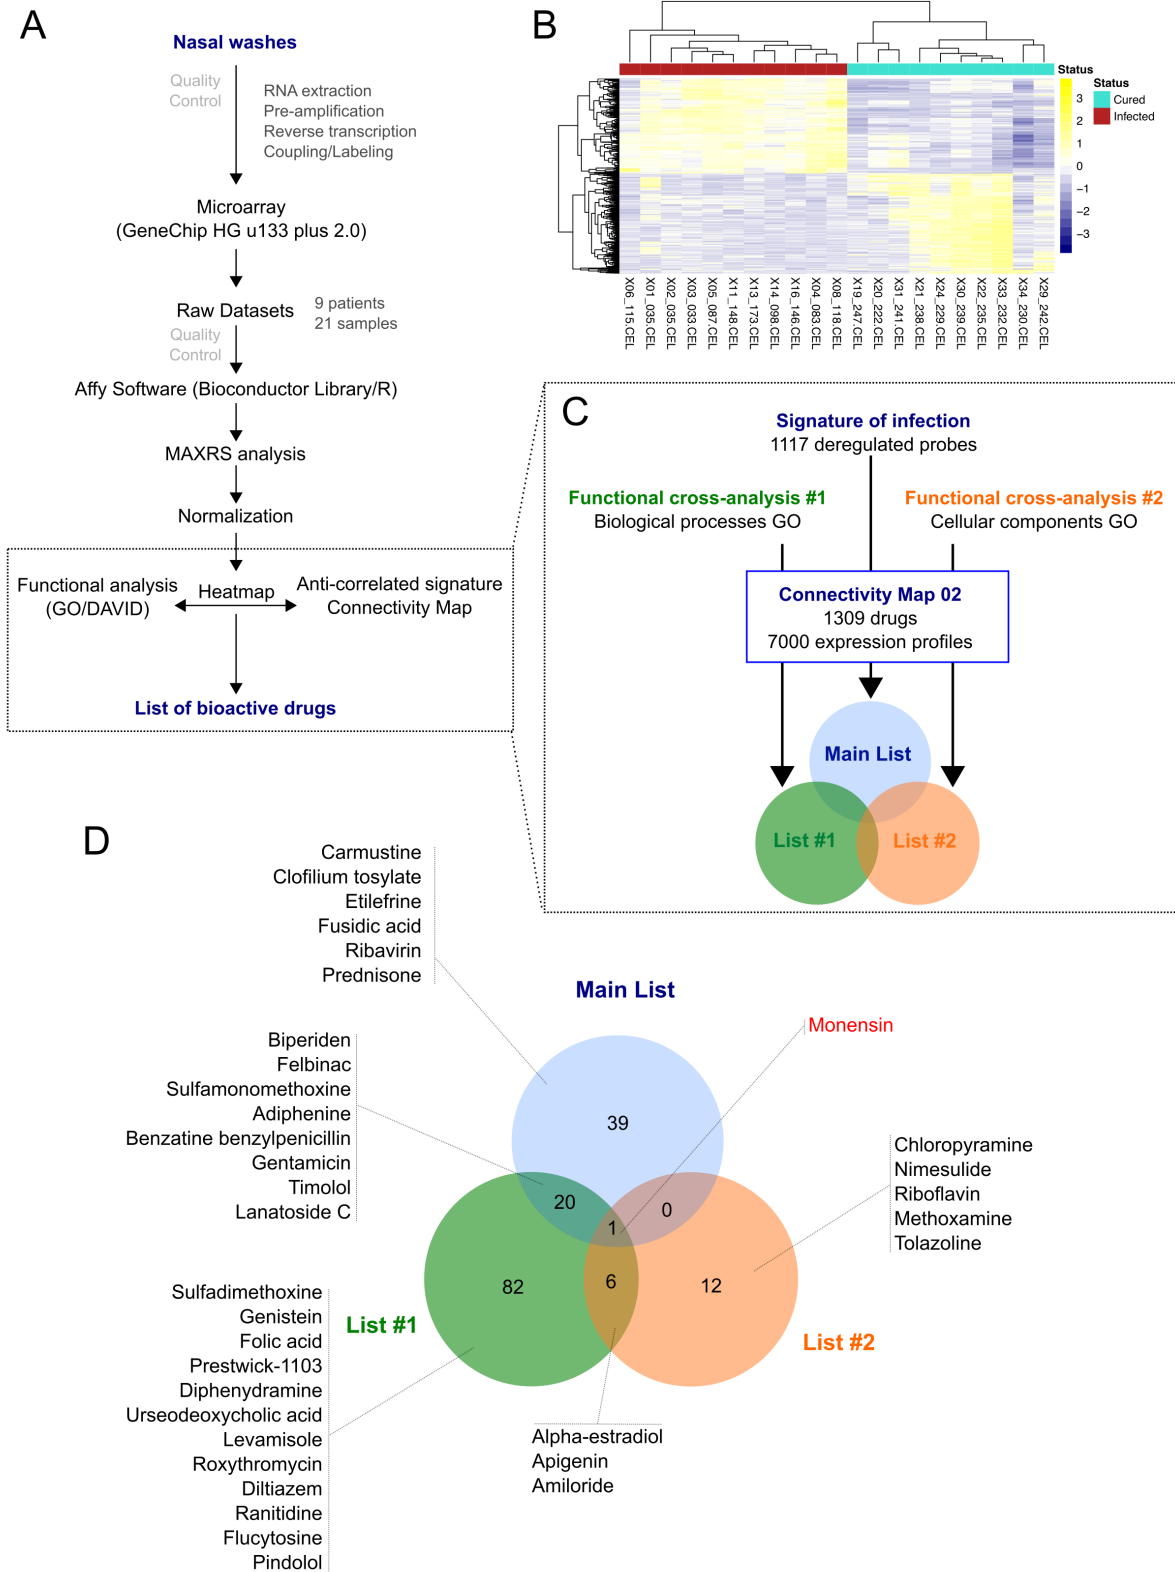

762 **Fig. 1. From nasal wash clinical samples to a shortlist of 35 candidate molecules. (A)**

763 Overview of the *in silico* strategy used in this study. A detailed description of the strategy is  
764 described in the Online Methods section. **(B)** Hierarchical clustering and heatmap of the 1,117  
765 most differentially deregulated genes between “infected” (red) and “cured” (light green) samples.  
766 Raw median centered expression levels are color coded from blue to yellow. Dendrograms  
767 indicate the correlation between clinical samples (columns) or genes (rows). **(C)** Functional  
768 cross-analysis of candidate molecules obtained from Connectivity Map (CMAP). Three lists of  
769 candidate molecules were obtained using different set of genes in order to introduce functional  
770 bias and add more biological significance to this first screening: a Main List based on the  
771 complete list of differentially expressed genes, and two other lists (List #1 and #2) based on  
772 subsets of genes belonging to significantly enriched Gene Ontology (GO) terms. **(D)** Venn  
773 Diagram comparing the total 160 molecules obtained from the three lists described in (C), with  
774 monensin as the only common molecule. Only the candidates selected for *in vitro* screening and  
775 validation are depicted.

776

A

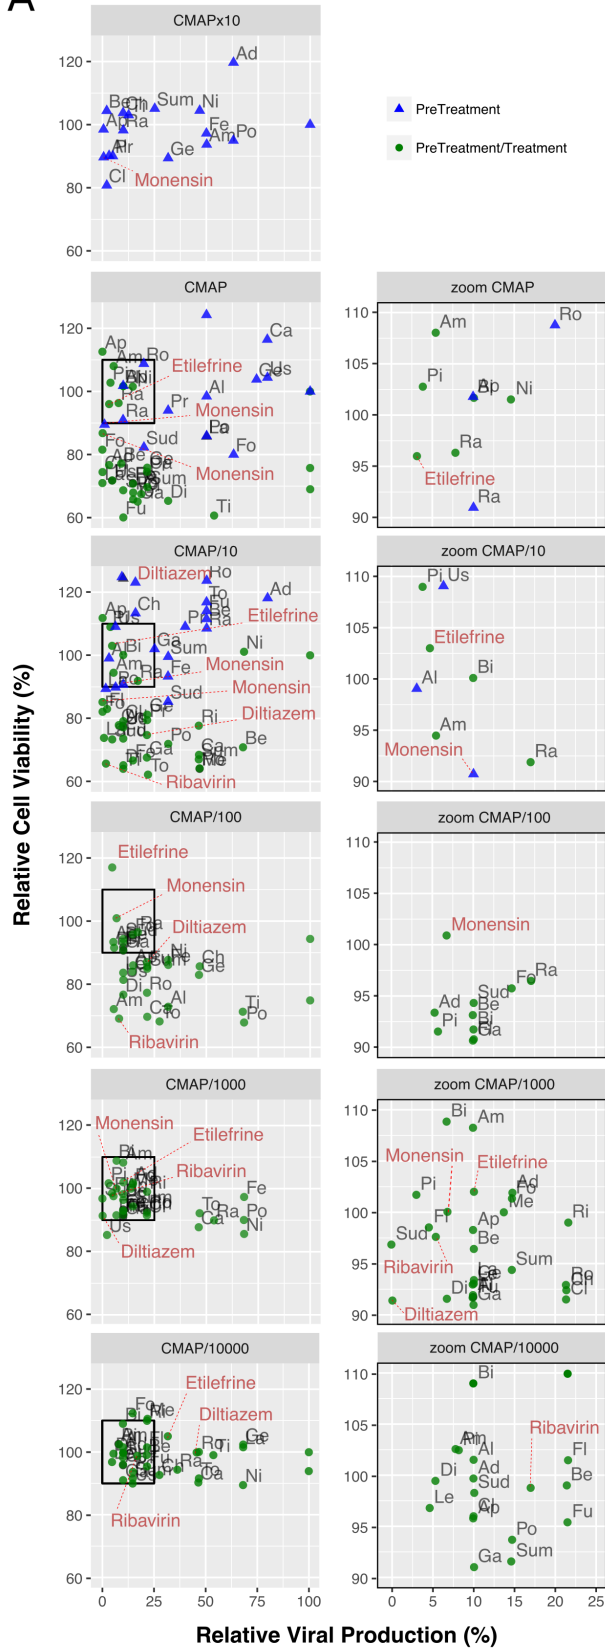

B

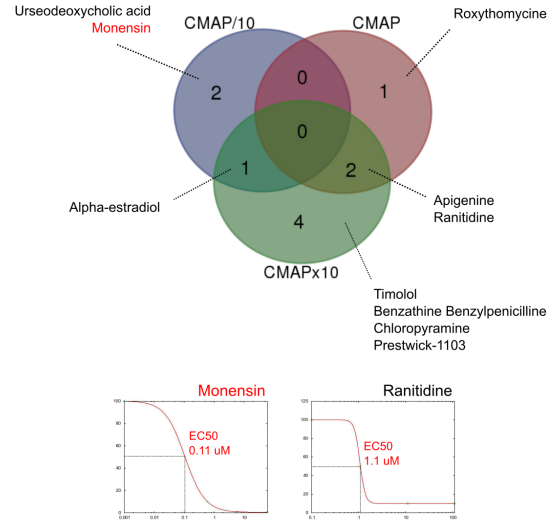

C

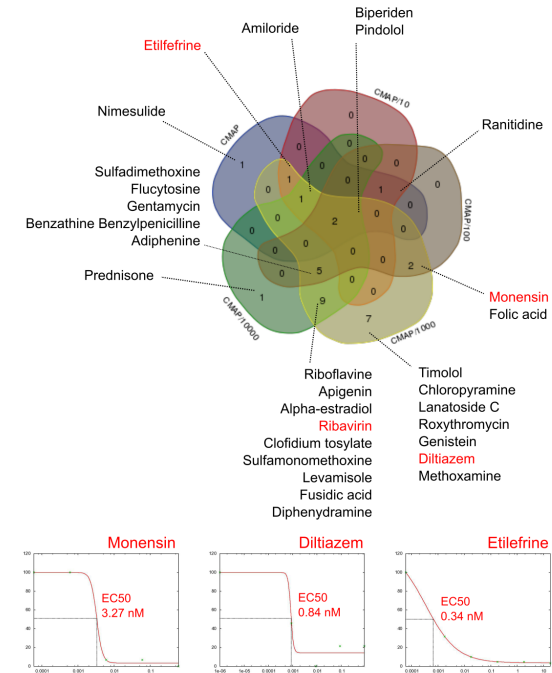

778 **Fig. 2. Screening and validation of the effect of selected molecules on A(H1N1)pdm09 viral**  
779 **growth *in vitro*.** (A, left) Evaluation on A549 cells of the antiviral potency of the 35 candidates  
780 selected by *in silico* analysis. Relative viral production (%; X axis) and relative cell viability (%;  
781 Y axis) of both pre-treatment (blue triangles) and pre-treatment/treatment (green circles)  
782 regimens were evaluated. A 10-fold drug concentration range using CMAP as reference (CMAP  
783 x10, CMAP, CMAP/10, CMAP/100, CMAP/1,000 and CMAP/10,000) was used. CMAPx10  
784 was only tested in the context of pre-treatment, by anticipation of a lower efficacy of molecules  
785 in this experimental setup. All experimental assays were performed in triplicate and mean values  
786 are represented. (A, right) Zoom panels depicting molecules defined as “inhibitors” according to  
787 the following two criteria: i) induce a 75% or higher reduction on viral production, and ii) have  
788 minor impact on cell viability, with relative values in the 90%-110% range. For clarity purposes,  
789 with the exception of diltiazem, etilefrine, monensin and ribavirin, abbreviations were used:  
790 Adiphenine "Ad"; Alpha-estradiol "Al"; Amiloride "Am"; Apigenin "Ap"; Benzathine  
791 Benzylpenicilline "Be"; Biperiden "Bi"; Carmustine "Ca"; Chloropyramine "Ch"; Clofidium  
792 tosylate "Cl"; Diphenhydramine "Di"; Felbinac "Fe"; Flucytosine "Fl"; Folic acid "Fo"; Fusidic  
793 acid "Fu"; Genistein "Ge"; Gentamycin "Ga"; Lanatoside C "La"; Levamisole "Le";  
794 Methoxamine "Me"; Nimesulide "Ni"; Pindolol "Pi"; Prednisone "Po"; Prestwick-1103 "Pr";  
795 Ranitidine "Ra"; Riboflavine "Ri"; Roxythromycin "Ro"; Sulfadimethoxine "Sud";  
796 Sulfamonomethoxine "Sum"; Timolol "Ti"; Tolazoline "To"; Urseodeoxycholic acid "Us".  
797 Dose-response curves for all the 35 molecules are presented in Supplementary Table 3. (B) Venn  
798 diagram of the 10 molecules identified in pre-treatment (10/35; 28.57%) and matching the  
799 “inhibitor” criteria, mainly when used at 10-fold CMAP concentration. EC50 curves for  
800 monensin and ranitidine are represented. (C) Venn diagram of the 30 “inhibitor” molecules



801 identified in pre-treatment/treatment (30/35; 85.7%). EC50 curves for monensin, diltiazem and  
802 etilefrine are represented.

803

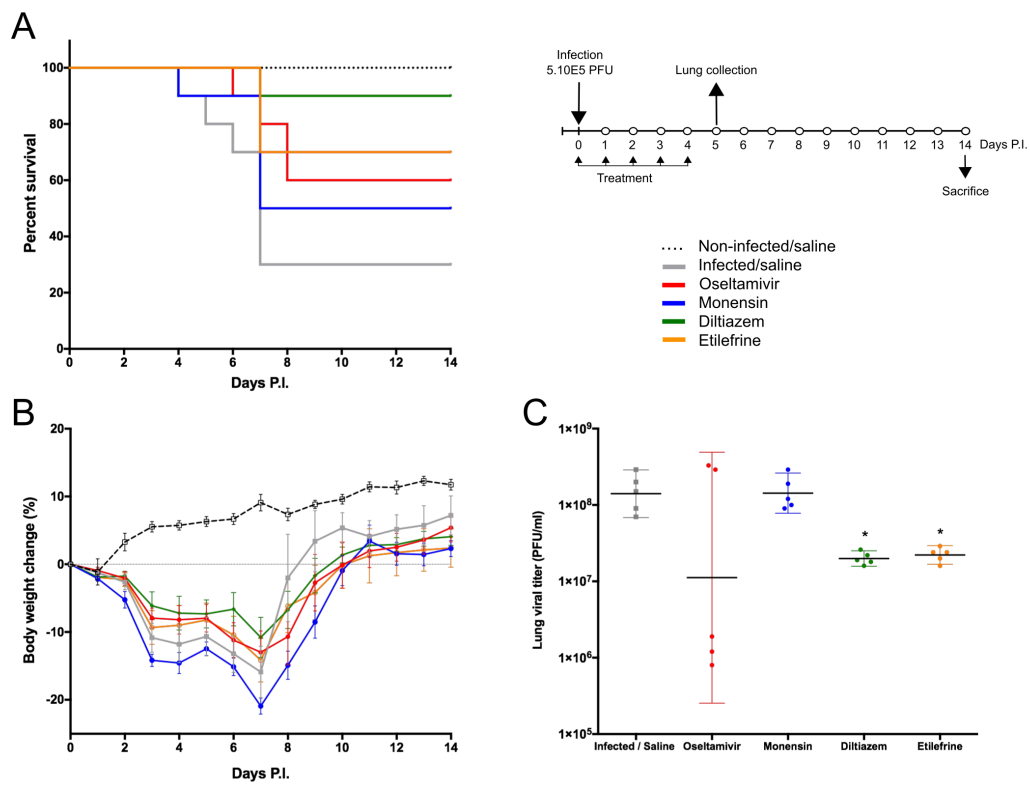

805 **Fig. 3. Efficacy of oral administration of selected molecules in mice infected with influenza**  
806 **A(H1N1)pdm09 virus.** C57BL/6N mice (n=15/group) were intranasally inoculated with  $5 \times 10^5$   
807 PFU of influenza A/Quebec/144147/09 virus on day 0 and treated by gavage with saline (grey),  
808 oseltamivir 10 mg/kg/day (red), monensin 10 mg/kg/day (blue), diltiazem 90 mg/kg/day (green),  
809 or etilefrine 3 mg/kg/day (orange). A mock-infected, saline-treated group (black dotted line, n=6)  
810 was included as control. Treatments were initiated on day 0 (6 h before infection) and  
811 administered once daily for 5 consecutive days. **(A)** Survival rates (n=10/group), **(B)** mean  
812 weight changes ( $\pm$ SEM, n=10/group or remaining mice) and **(C)** median ( $\pm$ CI95, n=5/group)  
813 lung viral titers on day 5 p.i. are shown. \*p<0.05, \*\*p<0.01 and \*\*\*p<0.001 compared to the  
814 infected saline-treated group by one-way ANOVA with Tukey's post-test. Data are  
815 representative of two independent experiments.

816

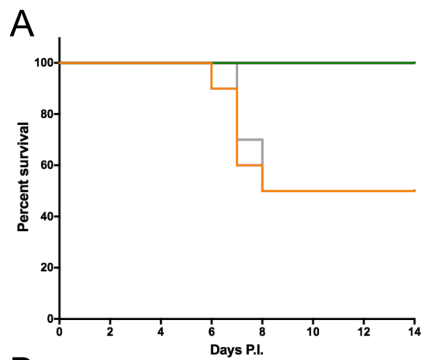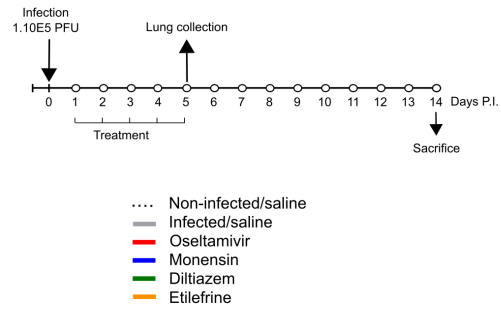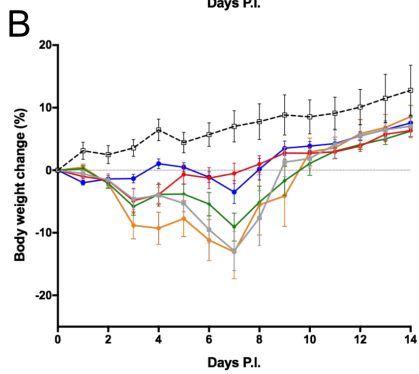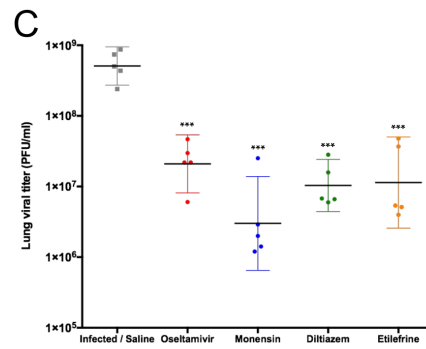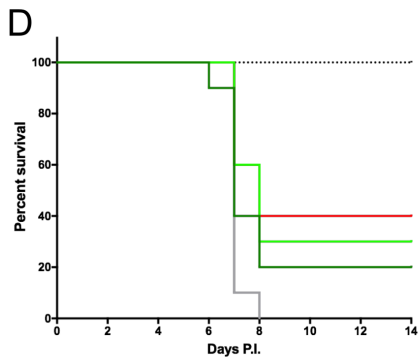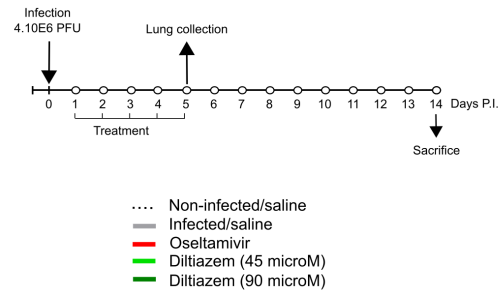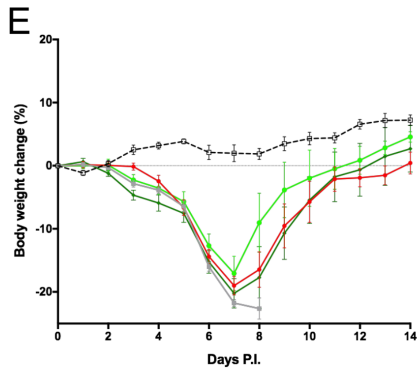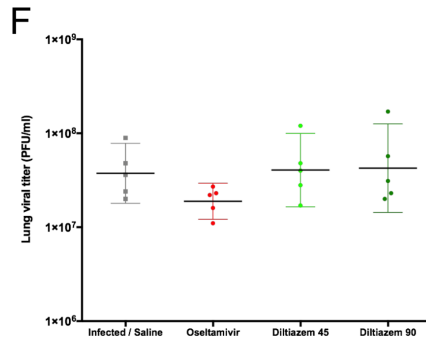

818 **Fig. 4. Efficacy of post-infection oral treatment with diltiazem and etilefrine in mice**  
819 **infected with influenza A(H1N1)pdm09 virus.** C57BL/6N mice (n=15/group) were  
820 intranasally inoculated with  $1 \times 10^5$  (A-C) or  $4 \times 10^6$  (D-F) PFU of influenza  
821 A/Quebec/144147/09 virus on day 0 and treated by gavage with saline (grey), oseltamivir 10  
822 mg/kg/day (red), monensin 10 mg/kg/day (blue, A only), diltiazem 45 mg/kg/day (light green, B  
823 only), diltiazem 90 mg/kg/day (dark green), or etilefrine 3 mg/kg/day (orange, A only). A mock-  
824 infected, saline-treated group (black dotted line, n=6) was included as control. Treatments were  
825 initiated on day 1 (24 h after infection and administered once daily for 5 consecutive days. (A,  
826 D) Survival rates (n=10/group), (B, E) mean weight changes ( $\pm$ SEM, n=10/group or remaining  
827 mice), and (C, F) median ( $\pm$ CI95, n=5/group) lung viral titers on day 5 p.i. are shown. \*p<0.05,  
828 \*\*p<0.01 and \*\*\*p<0.001 compared to the infected saline-treated group by one-way ANOVA  
829 with Tukey's post-test. Data are representative of two independent experiments.

830

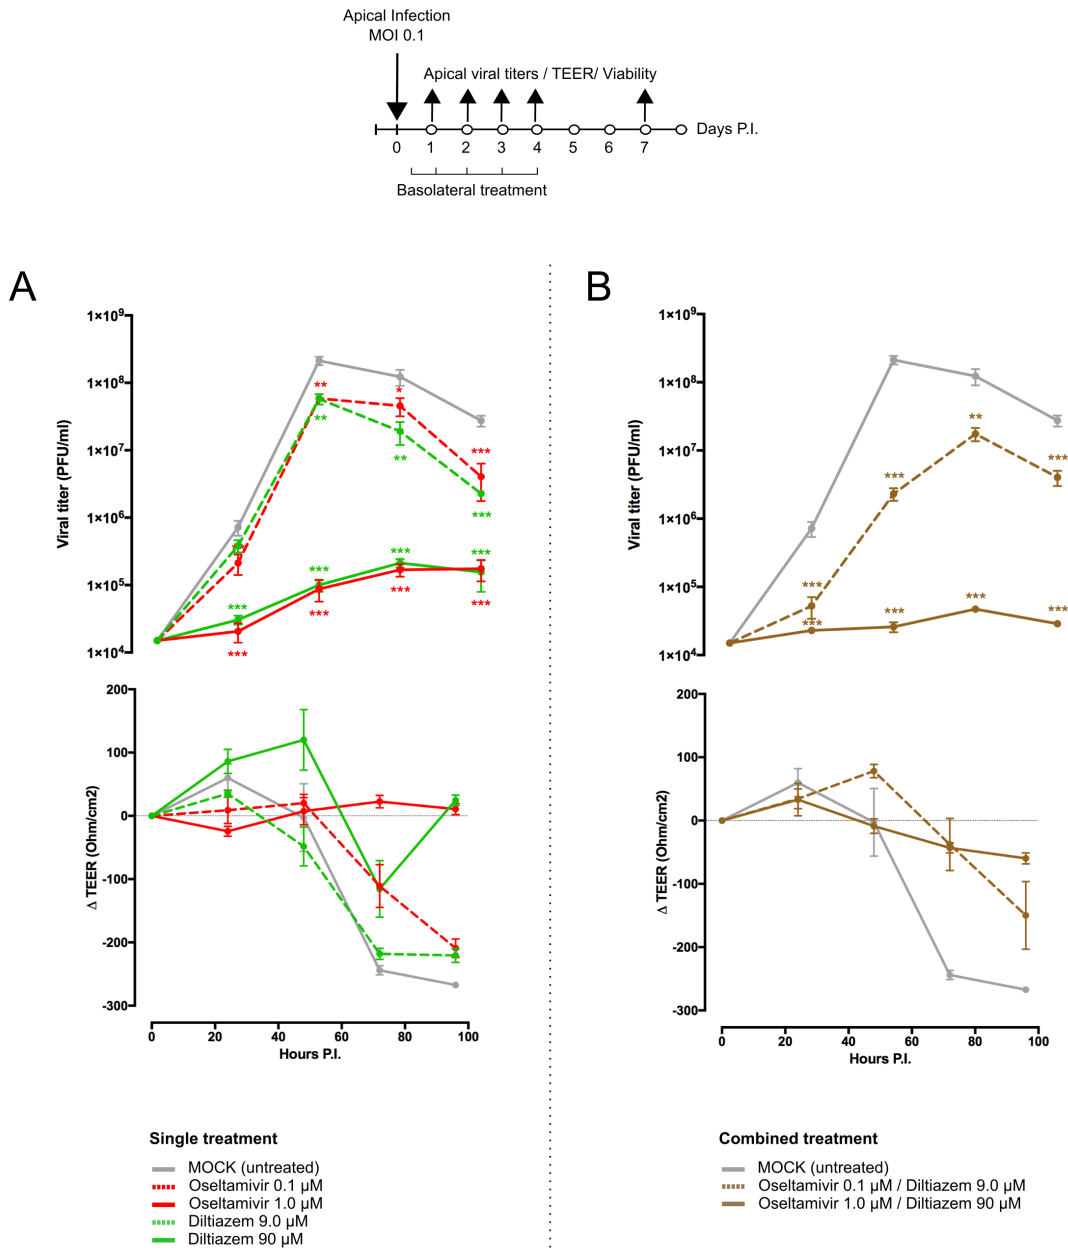

832 **Fig. 5. Diltiazem significantly reduces viral replication in infected reconstituted human**  
833 **airway epithelia (HAE).** Apical viral production ( $\pm$ SEM) and transepithelial electrical  
834 resistance ( $\Delta$  TEER $\pm$ SEM) in MucilAir® human airway epithelium infected on the apical pole  
835 with influenza A/Lyon/969/09 (H1N1)pdm09 virus at a MOI of 0.1 and subjected to **(A)** single  
836 or **(B)** combined treatments by the basolateral pole. Treatments with culture medium (mock,  
837 grey), oseltamivir 0.1  $\mu$ M (red, dotted line), oseltamivir 1  $\mu$ M (red, solid line), diltiazem 9  $\mu$ M  
838 (green, dotted line), diltiazem 90  $\mu$ M (green, solid line), oseltamivir 0.1  $\mu$ M / diltiazem 9  $\mu$ M  
839 (brown, dotted line) or oseltamivir 1  $\mu$ M / diltiazem 90  $\mu$ M (brown, solid line) were initiated 5 h  
840 after infection and administered once daily for 5 consecutive days. \* $p$ <0.05, \*\* $p$ <0.01 and  
841 \*\*\* $p$ <0.001 compared to the infected mock-treated group by one-way ANOVA with Tukey's  
842 post-test. Data are representative of three independent experiments.

843

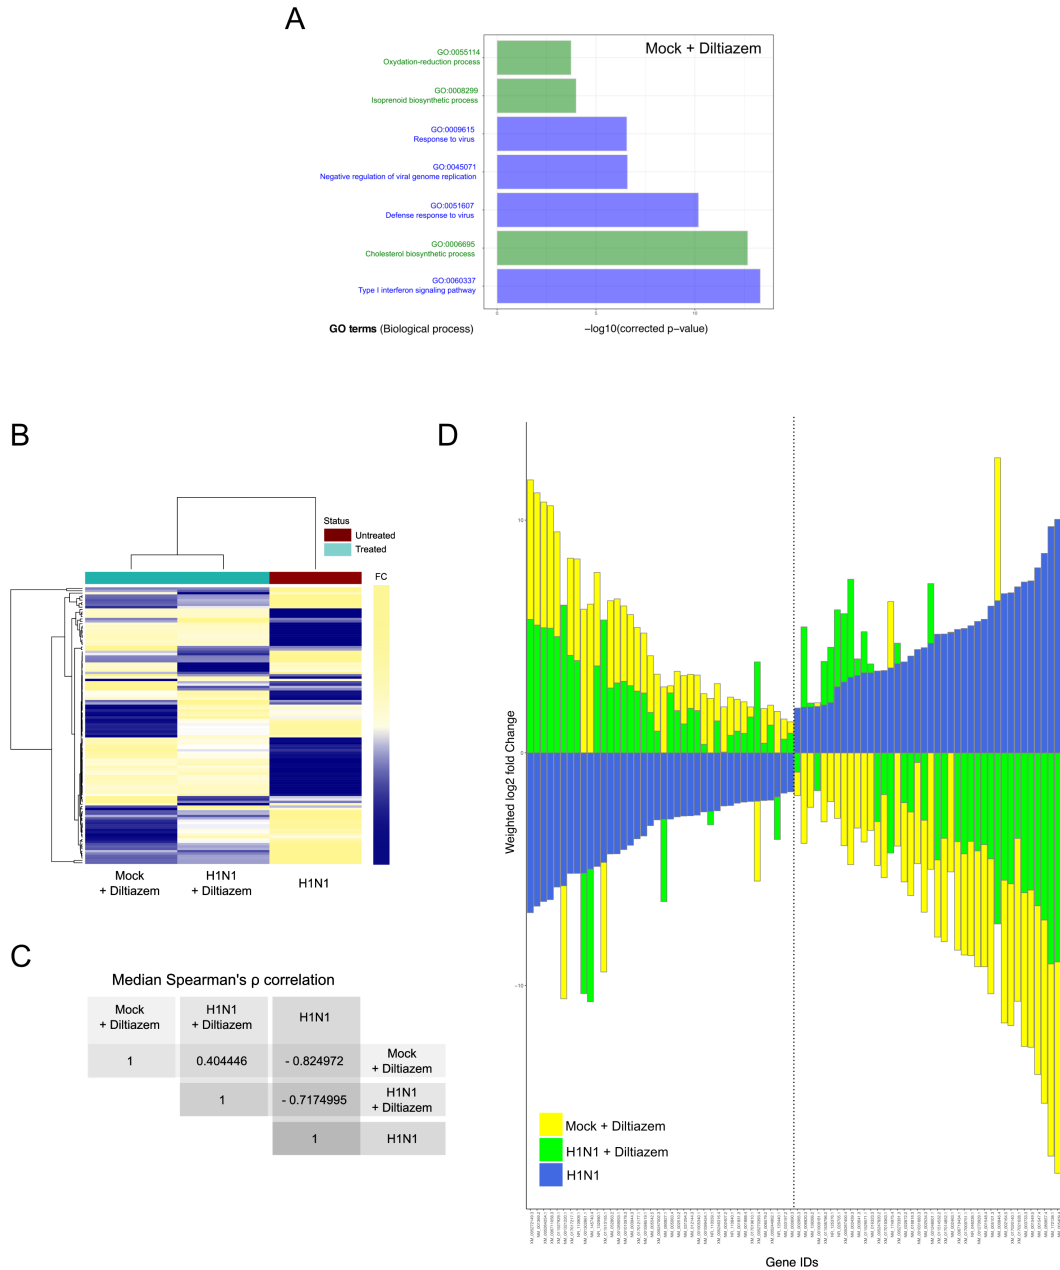



845 **Figure 6. Diltiazem treatment effectively induces significant reversion of the viral infection**  
846 **signature. (A)** DAVID gene enrichment analysis of the diltiazem transcriptional signature. The  
847 seven most significant biological processes (BP) are presented. BP related to antiviral response  
848 and cholesterol biosynthesis/metabolism are represented in blue and green, respectively. **(B)**  
849 Hierarchical clustering and heatmap of the 118 common differentially expressed transcripts  
850 (absolute fold change >2, Benjamini-Hochberg corrected p-value <0.05) between mock-infected  
851 / diltiazem (“mock + diltiazem”), infected / mock-treated (“H1N1”), or infected / diltiazem  
852 (“H1N1 + diltiazem”) HAE. The mock-infected / mock-treated (“mock”) condition was used as  
853 baseline. Mean-weighted fold changes are color-coded from blue to yellow. **(C)** Median  
854 Spearman  $\rho$  correlation value calculations between the 3 conditions highlighted in the heatmap.  
855 **(D)** Stacked barplot representation of the 40 most up/down-regulated transcripts highlighted in  
856 the analysis. Barplots were constructed in R3.3.1 based on mean-weighted fold changes and  
857 ordered according to H1N1 values (blue). Mock + diltiazem and H1N1 + diltiazem conditions  
858 are represented in yellow and green, respectively.

859

860 **Table 1. Shortlist of the 35 selected molecules and their documented pharmacological**  
861 **classes.** Shortlist of the 35 selected candidates representative of the 110 molecules obtained from  
862 the *in silico* screening (Fig 1 and S1). Documented pharmacological classes were obtained from  
863 PubChem (<https://pubchem.ncbi.nlm.nih.gov>). Asterisks (\*) indicate molecules previously  
864 evaluated for their antiviral properties according to the literature, and numerals (#) those  
865 belonging to anti-microbial or anti-inflammatory related pharmacological classes

**Table 1.**

| Name                         | Pharmacological Class                                                                                |
|------------------------------|------------------------------------------------------------------------------------------------------|
| Adiphenine                   | Parasympatholytics/Anticholinergics/Antispasmodics                                                   |
| Alpha-estradiol*             | 5 alpha-reductase inhibitors/Androgenic alopecia treatment                                           |
| Amiloride*#                  | Epithelial Sodium Channel Blockers/Diuretics/Acid Sensing Ion Channel Blockers                       |
| Apigenin*#                   | Anti-Inflammatory Agents, Non-Steroidal/?                                                            |
| Benzathine benzylpenicillin# | Anti-Bacterial Agents                                                                                |
| Biperiden*                   | Antiparkinson Agents/Muscarinic Antagonists/Parasympatholytics                                       |
| Carmustine                   | Antineoplastic Agents, Alkylating                                                                    |
| Chloropyramine               | Histamine H1 Antagonists                                                                             |
| Clofilium tosylate           | Anti-Arrhythmia Agents                                                                               |
| Diltiazem                    | Antihypertensive Agents/Calcium Channel Blockers/Cardiovascular Agents/Vasodilator Agents            |
| Diphenhydramine              | Anesthetics, Local/Anti-Allergic Agents/Antiemetics/Histamine H1 Antagonists/Hypnotics and Sedatives |
| Etilefrine                   | Adrenergic beta-1 and alpha agonist /Cardiotonic/antihypotensive agent.                              |
| Felbinac#                    | Anti-Inflammatory Agents, Non-Steroidal                                                              |
| Flucytosine*#                | Antifungal Agents/Antimetabolites                                                                    |
| Folic acid                   | Hematinics/Vitamin B Complex                                                                         |
| Fusidic acid#                | Anti-Bacterial Agents/Protein Synthesis Inhibitors                                                   |
| Genistein                    | Anticarcinogenic Agents/Phytoestrogens/Protein Kinase Inhibitors                                     |
| Gentamicin#                  | Anti-Bacterial Agents/Protein Synthesis Inhibitors                                                   |
| Lanatoside C                 | Anti-Arrhythmia Agents                                                                               |
| Levamisole*                  | Adjuvants, Immunologic/Antinematodal Agents/Antirheumatic Agents                                     |
| Methoxamine                  | Adrenergic alpha-1 Receptor Agonists/Sympathomimetics/Vasoconstrictor Agents                         |
| Monensin*#                   | Antifungal Agents/Antiprotozoal Agents/Coccidiostats/Proton Ionophores/Sodium Ionophores             |
| Nimesulide*#                 | Anti-Inflammatory Agents, Non-Steroidal/Cyclooxygenase Inhibitors                                    |
| Pindolol                     | Adrenergic beta-Antagonists/Antihypertensive Agents/Serotonin Antagonists/Vasodilator Agents         |
| Prednisone#                  | Anti-Inflammatory Agents/Antineoplastic Agents, Hormonal/Glucocorticoids                             |
| Prestwick-1103#              | Anti-Inflammatory Agents, Non-Steroidal/Cyclooxygenase Inhibitors                                    |
| Ranitidine                   | Anti-Ulcer Agents/Histamine H2 Antagonists                                                           |
| Ribavirin*                   | Antimetabolites/Antiviral Agents                                                                     |
| Riboflavin*                  | Photosensitizing Agents/Vitamin B Complex                                                            |
| Roxithromycin#               | Anti-Bacterial Agents                                                                                |
| Sulfadimethoxine#            | Anti-Infective Agents                                                                                |
| Sulfamonomethoxine#          | Anti-Infective Agents                                                                                |
| Timolol*                     | Adrenergic beta-Antagonists/Anti-Arrhythmia Agents/Antihypertensive Agents                           |
| Tolazoline                   | Adrenergic alpha-Antagonists/Antihypertensive Agents/Vasodilator Agents                              |
| Ursodeoxycholic acid         | Cholagogues and Cholaretics                                                                          |

## Supplementary Materials

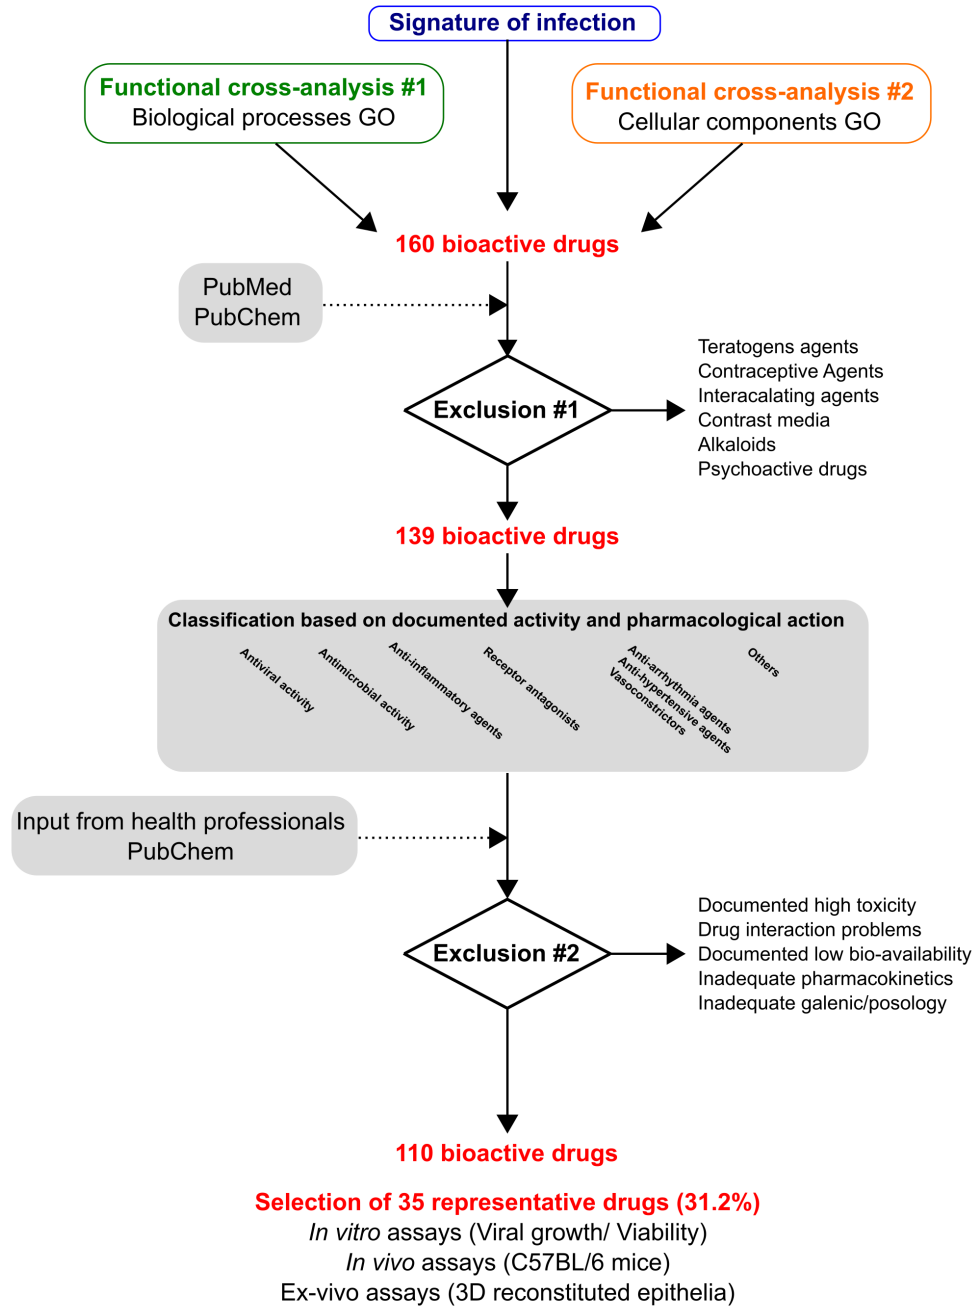

**Fig. S1. Decision tree used to rationally reduce the number of drug candidates.** Bioactive molecules were excluded if not compatible with a final use as antiviral, mostly for safety (e.g. teratogens, intercalating agents) and/or pharmacological (e.g. documented low bioavailability) reasons. An additional selection level based on analysis of documented pharmacological actions was included, to finally define a shortlist of 35 representative molecules (<3% of CMAP) for in vitro screening (Table 1).

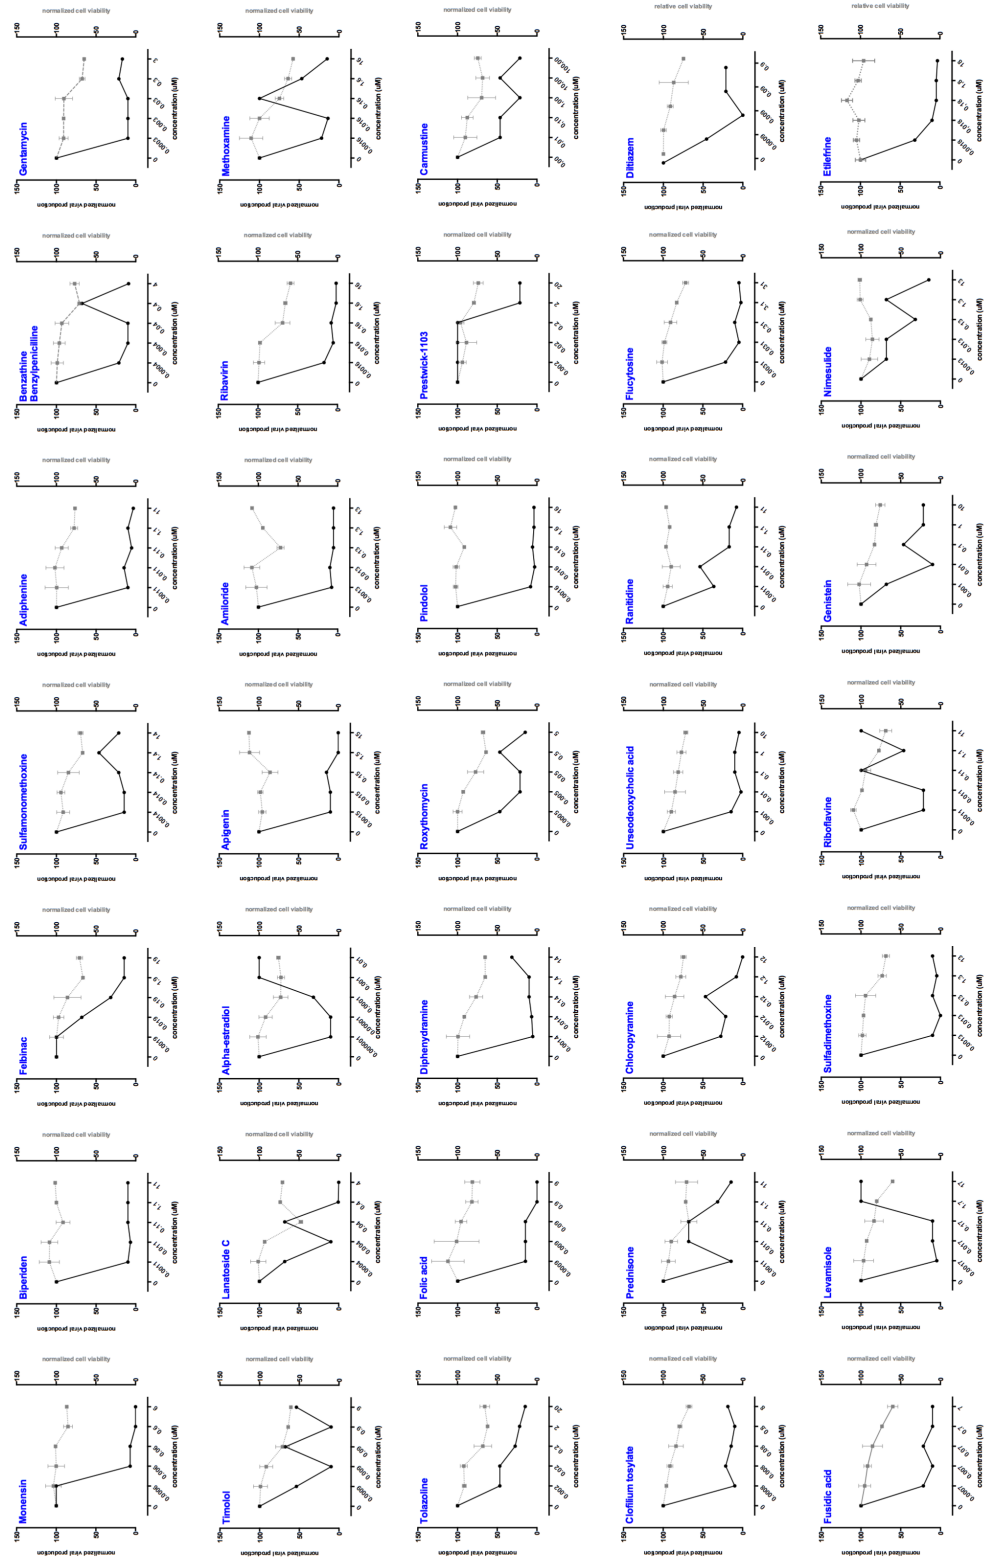

**Fig. S2. Dose-response curves for the 35 molecules tested *in vitro*.** In comparison with a mock-treated control, the impact of pre-treatment/treatment on % relative viral production (black line, left Y axis) and % relative cell viability (grey line, right Y axis) was measured at the indicated concentrations.

A

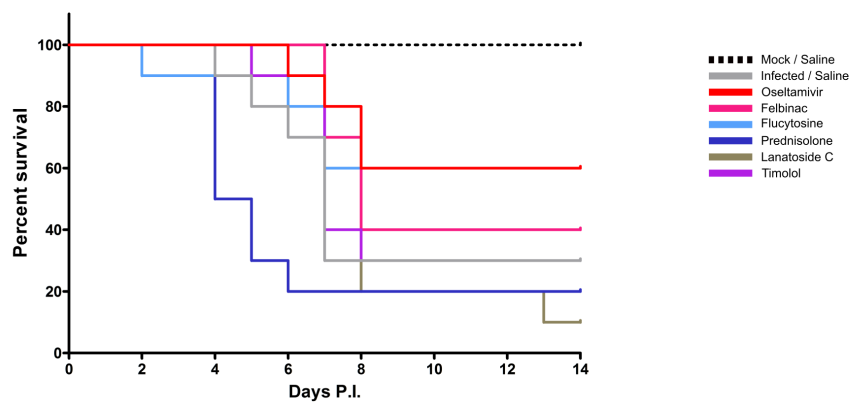

B

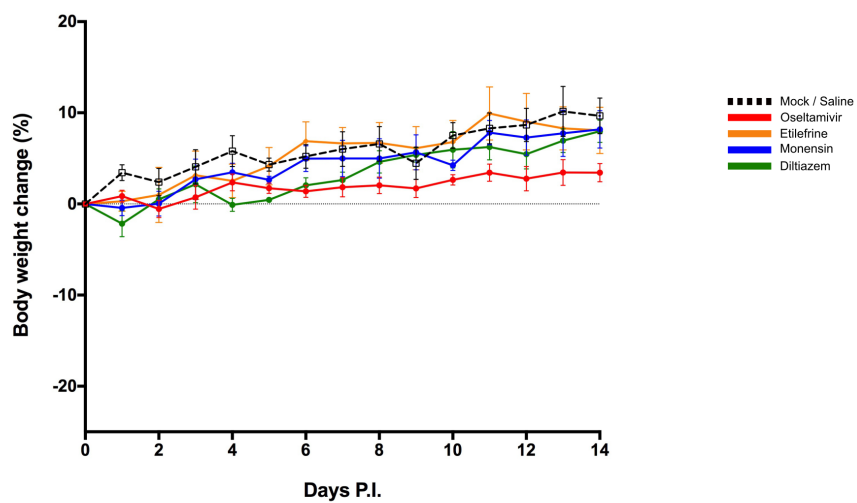



**Fig. S3. Efficacy and toxicity after oral administration of selected molecules in mice. (A)**

Survival curves of C57BL/6N mice (n=15/group), intranasally inoculated with  $5 \times 10^5$  PFU of influenza A/Quebec/144147/09 virus on day 0 and treated by gavage with saline (grey), oseltamivir 10 mg/kg/day (red), lanatoside C 100 mg/kg/day (olive), prednisolone 5 mg/kg/day (dark blue), flucytosine 240 mg/kg/day (light blue), felbinac 5 mg/kg/day (fuchsia) or timolol 50 mg/kg/day (purple). A mock-infected, saline-treated group (black dotted line, n=6) was included as control. Treatments were initiated on day 0 (6 h before infection) and administered once daily for 5 consecutive days. (B) Body weight changes of mock-infected C57BL/6N mice (n=10/group) treated by gavage with saline (grey), oseltamivir 10 mg/kg/day (red), monensin 10 mg/kg/day (blue), diltiazem 90 mg/kg/day (green), or etilefrine 3 mg/kg/day (orange). A saline-treated group (black dotted line, n=6) was included as control. Treatments were initiated on day 0 (6 h before mock-infection) and administered once daily for 5 consecutive days.

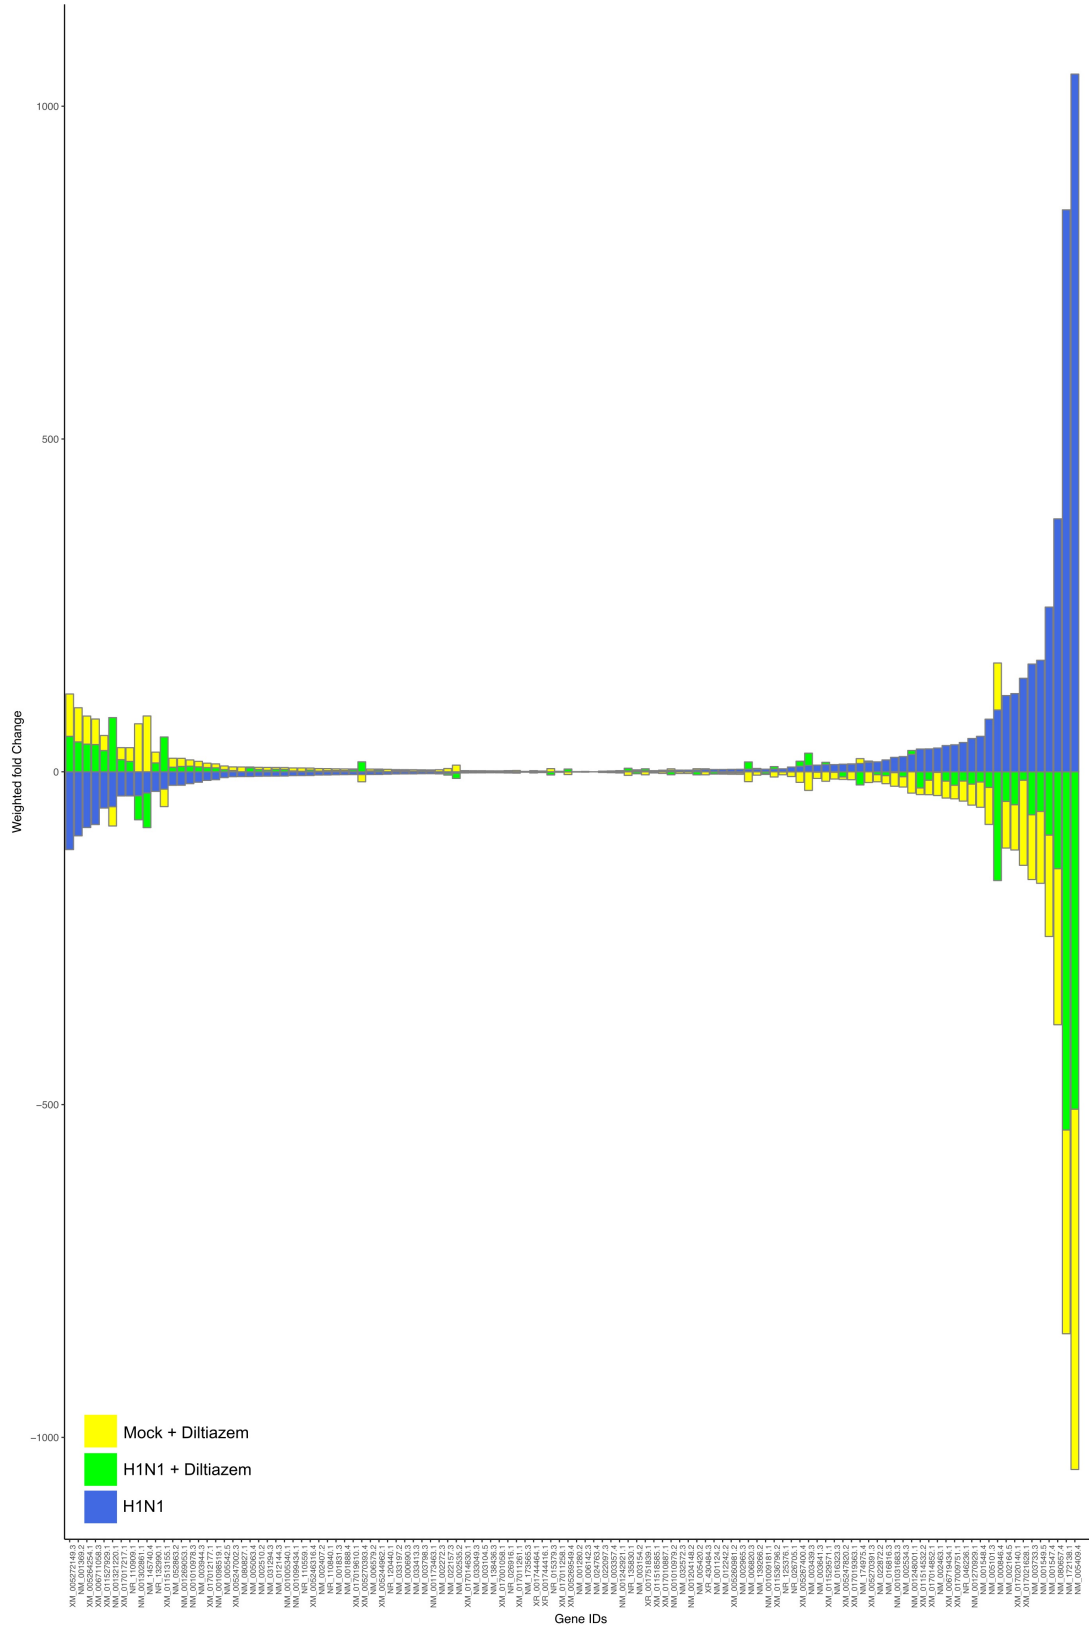

**Fig. S4. Diltiazem treatment effectively induces significant reversion of the viral infection signature.** Stacked barplots with mean-weighted fold changes for the complete list of the 118 common differentially expressed transcripts (absolute fold change  $>2$ , Benjamini-Hochberg corrected p-value  $<0.05$ ) between the mock + diltiazem (yellow), H1N1 (blue), and H1N1 + diltiazem (green) conditions. Barplots were constructed in R3.3.1 based on mean-weighted fold changes and ordered according to H1N1 values (blue).

| <b>Demographic Characteristics</b>      |             |
|-----------------------------------------|-------------|
| Number of patients                      | 9           |
| Male sex ratio (n,%)                    | 1 (11.1)    |
| Age (Mean, SD)                          | 31.67 (8.9) |
| Min-Max age (years)                     | 19-42       |
| <b>Delay from beginning of symptoms</b> |             |
| Delay (Mean, SD)                        | 24.56 (8.8) |
| <b>Clinical symptoms</b>                |             |
| Highest body Temperature (°C, mean, SD) | 38.98 (0.4) |
| <b>Constitutional symptoms</b>          |             |
| Chills and/or sweats (n,%)              | 9 (100)     |
| Aches (n,%)                             | 9 (100)     |
| Fatigue (n,%)                           | 9 (100)     |
| Headache (n,%)                          | 8 (88.9)    |
| <b>Respiratory symptoms</b>             |             |
| Cough (n,%)                             | 7 (77.8)    |
| Pharyngitis (n,%)                       | 3 (33.3)    |
| Sore throat or nasal congestion (n,%)   | 6 (66.7)    |
| <b>Other symptoms</b>                   |             |
| Expectoration (n,%)                     | 1 (11.1)    |
| Otitis (n,%)                            | 0 (0.0)     |
| Digestive disturbance (n,%)             | 0 (0.0)     |

**Table S1. Demographic and clinical characteristics of patients included in the study.**

Samples were obtained in the context of a previous clinical trial conducted in France during the A(H1N1)pdm09 pandemic, aimed at evaluating the antiviral efficacy and tolerability of classic antiviral monotherapy versus bitherapy (Escuret et al., 2012).

| <b>Molecules</b>                   | <b>Pharmalogical class</b>                                                                                               |
|------------------------------------|--------------------------------------------------------------------------------------------------------------------------|
| <b>Monensin*</b>                   | Antifungal Agents/Antiprotozoal Agents/Coccidiostats/Proton Ionophores/Sodium Ionophores                                 |
| <b>Isoxicam</b>                    | Anti-Inflammatory Agents, Non-Steroidal                                                                                  |
| <b>Iloprost*</b>                   | Platelet Aggregation Inhibitors/Vasodilator Agents                                                                       |
| <b>Securinine</b>                  | Alkaloids/GABAA Receptor Antagonists                                                                                     |
| <b>Prestwick-692</b>               | Steroid Alkaloids                                                                                                        |
| <b>Biperiden*</b>                  | Antiparkinson Agents/Muscarinic Antagonists/Parasympatholytics                                                           |
| <b>Clorsulon</b>                   | Anthelmintics/Antiplatyhelminic Agents                                                                                   |
| <b>Felbinac</b>                    | Anti-Inflammatory Agents, Non-Steroidal                                                                                  |
| <b>Chenodeoxycholic acid*</b>      | Cathartics/Gastrointestinal Agents                                                                                       |
| <b>Sulfamonomethoxine</b>          | Anti-Infective Agents                                                                                                    |
| <b>3-acetamidocoumarin</b>         | ?                                                                                                                        |
| <b>Meteneprost</b>                 | Abortifacient Agents, Nonsteroidal                                                                                       |
| <b>Adiphenine</b>                  | Parasympatholytics/Anticholinergics/Antispasmodics                                                                       |
| <b>Benzathine benzylpenicillin</b> | Anti-Bacterial Agents                                                                                                    |
| <b>Gentamicin</b>                  | Anti-Bacterial Agents/Protein Synthesis Inhibitors                                                                       |
| <b>Timolol*</b>                    | Adrenergic beta-Antagonists/Anti-Arrhythmia Agents/Antihypertensive Agents                                               |
| <b>Atractyloside*</b>              | Enzyme Inhibitors                                                                                                        |
| <b>Nadolol</b>                     | Adrenergic beta-Antagonists/Anti-Arrhythmia Agents/Antihypertensive Agents/Sympatholytics                                |
| <b>Lycorine*</b>                   | Alkaloids/Protein Synthesis Inhibitors                                                                                   |
| <b>Tranexamic acid*</b>            | Antifibrinolytic Agents                                                                                                  |
| <b>Lanatoside C</b>                | Anti-Arrhythmia Agents                                                                                                   |
| <b>Podophyllotoxin*</b>            | Antineoplastic Agents, Phytogenic/Keratolytic Agents/Tubulin Modulators                                                  |
| <b>Alpha-estradiol*</b>            | 5alpha-reductase inhibitors/Androgenic alopecia treatment                                                                |
| <b>Alprostadi</b>                  | Fibrinolytic Agents/Platelet Aggregation Inhibitors/Vasodilator Agents                                                   |
| <b>Apigenin*</b>                   | Anti-Inflammatory Agents, Non-Steroidal/?                                                                                |
| <b>Pipenzolate bromide</b>         | Muscarinic Receptor Antagonists                                                                                          |
| <b>Amiloride*</b>                  | Epithelial Sodium Channel Blockers/Diuretics/Acid Sensing Ion Channel Blockers                                           |
| <b>STOCK1N-35696</b>               | ?                                                                                                                        |
| <b>Carmustine</b>                  | Antineoplastic Agents, Alkylating                                                                                        |
| <b>PF-00539745-00</b>              | ?                                                                                                                        |
| <b>Clofilium tosylate</b>          | Anti-Arrhythmia Agents                                                                                                   |
| <b>Prestwick-983*</b>              | Antimetabolites/Antiviral Agents                                                                                         |
| <b>Prestwick-675</b>               | Anthelmintics/Anticestodal Agents/Antiprotozoal Agents/Tubulin Modulators                                                |
| <b>Atracurium besilate</b>         | Neuromuscular Nondepolarizing Agents/Nicotinic Antagonists                                                               |
| <b>Xamoterol</b>                   | Adrenergic beta-1 Receptor Agonists                                                                                      |
| <b>Demecarium bromide</b>          | Cholinesterase Inhibitors                                                                                                |
| <b>Iopromide</b>                   | Contrast Media                                                                                                           |
| <b>Etilefrine</b>                  | Adrenergic alpha-Agonists/Adrenergic beta-1 Receptor Agonists/Cardiotonic Agents/Sympathomimetics/Vasoconstrictor Agents |
| <b>Iproniazid</b>                  | Antidepressive Agents/Monoamine Oxidase Inhibitors                                                                       |
| <b>Ketotifen*</b>                  | Anti-Allergic Agents/Antipruritics/Histamine H1 Antagonists                                                              |
| <b>Gly-His-Lys</b>                 | Anti-Inflammatory Agents, Non-Steroidal?                                                                                 |
| <b>Canadine*</b>                   | Anti-Arrhythmia Agents/Calcium Channel Blockers/Platelet Aggregation Inhibitors                                          |
| <b>Viomycin</b>                    | Anti-Bacterial Agents/Antibiotics, Antitubercular/Protein Synthesis Inhibitors                                           |

|                                  |                                                                                                           |
|----------------------------------|-----------------------------------------------------------------------------------------------------------|
| <b>Disopyramide</b>              | Anti-Arrhythmia Agents/Voltage-Gated Sodium Channel Blockers                                              |
| <b>Fusidic acid</b>              | Anti-Bacterial Agents/Protein Synthesis Inhibitors                                                        |
| <b>Amiprilose</b>                | Adjuvants, Immunologic/Anti-Inflammatory Agents, Non-Steroidal/Antiviral Agents                           |
| <b>Anisomycin*</b>               | Anti-Bacterial Agents/Antiprotozoal Agents/Nucleic Acid Synthesis Inhibitors/Protein Synthesis Inhibitors |
| <b>Ajmaline</b>                  | Anti-Arrhythmia Agents                                                                                    |
| <b>Arecoline</b>                 | Cholinergic Agonists                                                                                      |
| <b>Metampicillin</b>             | Anti-Bacterial Agents                                                                                     |
| <b>Lasalocid</b>                 | Anti-Bacterial Agents/Coccidiostats/Ionophores                                                            |
| <b>Tolnaftate</b>                | Antifungal Agents                                                                                         |
| <b>Metixene</b>                  | Muscarinic Receptor Antagonists                                                                           |
| <b>PF-00539758-00</b>            | ?                                                                                                         |
| <b>Streptomycin</b>              | Anti-Bacterial Agents/Protein Synthesis Inhibitors                                                        |
| <b>Sulfapyridine</b>             | Anti-Infective Agents/Dermatologic Agents                                                                 |
| <b>Pivmecillinam</b>             | Anti-Bacterial Agents/Anti-Infective Agents, Urinary                                                      |
| <b>Ribavirin*</b>                | Antimetabolites/Antiviral Agents                                                                          |
| <b>Prestwick-642*</b>            | Dermatologic Agents/Teratogens                                                                            |
| <b>Bumetanide</b>                | Diuretics/Sodium Potassium Chloride Symporter Inhibitors                                                  |
| <b>Prednisone</b>                | Anti-Inflammatory Agents/Antineoplastic Agents, Hormonal/Glucocorticoids                                  |
| <b>Doxylamine</b>                | Antiemetics/Histamine H1 Antagonists                                                                      |
| <b>Diphenylpyraline</b>          | Histamine H1 Antagonists                                                                                  |
| <b>Finasteride</b>               | 5-alpha Reductase Inhibitors                                                                              |
| <b>Rosiglitazone*</b>            | Hypoglycemic Agents                                                                                       |
| <b>15-delta prostaglandin J2</b> | Anti-Inflammatory Agents, Non-Steroidal?/NFkB inhibitor?                                                  |
| <b>5230742</b>                   | ?                                                                                                         |
| <b>Chloropyramine</b>            | Histamine H1 Antagonists                                                                                  |
| <b>Prestwick-685</b>             | Anti-Inflammatory Agents, Non-Steroidal/Coloring Agents/Leprostatic Agents                                |
| <b>Nimesulide*</b>               | Anti-Inflammatory Agents, Non-Steroidal/Cyclooxygenase Inhibitors                                         |
| <b>Morantel</b>                  | Anthelmintics/Antinematodal Agents                                                                        |
| <b>Tropicamide</b>               | Muscarinic Receptor Antagonists/Mydriatics                                                                |
| <b>Piperidolate</b>              | Muscarinic Receptor Antagonists                                                                           |
| <b>Riboflavin*</b>               | Photosensitizing Agents/Vitamin B Complex                                                                 |
| <b>Methoxamine</b>               | Adrenergic alpha-1 Receptor Agonists/Sympathomimetics/Vasoconstrictor Agents                              |
| <b>Hydrocotarnine</b>            | Alkaloids/?                                                                                               |
| <b>Propidium iodide</b>          | Coloring Agents/Indicators and Reagents/Intercalating Agents                                              |
| <b>Tolazoline</b>                | Adrenergic alpha-Antagonists/Antihypertensive Agents/Vasodilator Agents                                   |
| <b>5279552</b>                   | ?                                                                                                         |
| <b>Sulfadimethoxine</b>          | Anti-Infective Agents                                                                                     |
| <b>N-acetyl-L-leucine</b>        | <i>Vertigo treatment/?</i>                                                                                |
| <b>Gibberellic acid</b>          | Plant Growth Regulators                                                                                   |
| <b>Clorgiline</b>                | Antidepressive Agents/Monoamine Oxidase Inhibitors                                                        |
| <b>Genistein</b>                 | Anticarcinogenic Agents/Phytoestrogens/Protein Kinase Inhibitors                                          |
| <b>Pargyline</b>                 | Antihypertensive Agents/Monoamine Oxidase Inhibitors                                                      |
| <b>Cortisone</b>                 | Anti-Inflammatory Agents                                                                                  |
| <b>Medrysone</b>                 | Anti-inflammatory Agents/Glucocorticoids                                                                  |
| <b>Isflupredone</b>              | Anti-inflammatory Agents/Mineralcorticoids                                                                |

|                                 |                                                                                                                 |
|---------------------------------|-----------------------------------------------------------------------------------------------------------------|
| <b>Prestwick-1082</b>           | ?                                                                                                               |
| <b>Aciclovir*</b>               | Antiviral Agents                                                                                                |
| <b>Sulconazole</b>              | Antifungal Agents                                                                                               |
| <b>Cycloserine</b>              | Anti-Infective Agents, Urinary/Antibiotics, Antitubercular/Antimetabolites                                      |
| <b>Procainamide</b>             | Anti-Arrhythmia Agents/Voltage-Gated Sodium Channel Blockers                                                    |
| <b>Chlortalidone</b>            | Antihypertensive Agents/Diuretics/Sodium Chloride Symporter Inhibitors                                          |
| <b>Chlorzoxazone</b>            | Muscle Relaxants, Central                                                                                       |
| <b>Oxolamine</b>                | Antitussive Agents                                                                                              |
| <b>Folic acid</b>               | Hematinics/Vitamin B Complex                                                                                    |
| <b>Furazolidone</b>             | Anti-Infective Agents, Local/Anti-Infective Agents, Urinary/Antitrichomonal Agents/Monoamine Oxidase Inhibitors |
| <b>Cotinine</b>                 | Indicators and Reagents                                                                                         |
| <b>Ikarugamycin*</b>            | Anti-Infective Agents                                                                                           |
| <b>H-7</b>                      | Enzyme Inhibitors                                                                                               |
| <b>Natamycin</b>                | Anti-Bacterial Agents/Anti-Infective Agents, Local/Antifungal Agents                                            |
| <b>H-89*</b>                    | Protein Kinase Inhibitors                                                                                       |
| <b>Guanadrel</b>                | Antihypertensive Agents                                                                                         |
| <b>Midodrine</b>                | Adrenergic alpha-1 Receptor Agonists/Sympathomimetics/Vasoconstrictor Agents                                    |
| <b>Etiocholanolone</b>          | Ketosteroids                                                                                                    |
| <b>Methyldopate</b>             | Antihypertensive Agents                                                                                         |
| <b>Oxymetazoline*</b>           | Adrenergic alpha-Agonists/Nasal Decongestants/Sympathomimetics                                                  |
| <b>Levomepromazine</b>          | Analgesics, Non-Narcotic/Antipsychotic Agents/Dopamine Antagonists                                              |
| <b>Thapsigargin</b>             | Enzyme Inhibitors                                                                                               |
| <b>Pyrrithyldione</b>           | Psychoactive drugs                                                                                              |
| <b>Nicergoline</b>              | Adrenergic alpha-Antagonists/Nootropic Agents/Vasodilator Agents                                                |
| <b>Apramycin</b>                | Anti-Bacterial Agents                                                                                           |
| <b>Prestwick-1103</b>           | Anti-Inflammatory Agents, Non-Steroidal/Cyclooxygenase Inhibitors                                               |
| <b>Fenoprofen</b>               | Anti-Inflammatory Agents, Non-Steroidal/Cyclooxygenase Inhibitors                                               |
| <b>Fludrocortisone</b>          | Mineralocorticoids/Anti-Inflammatory Agents                                                                     |
| <b>Diphenhydramine</b>          | Anesthetics, Local/Anti-Allergic Agents/Antiemetics/Histamine H1 Antagonists/Hypnotics and Sedatives            |
| <b>Naloxone</b>                 | Narcotic Antagonists                                                                                            |
| <b>Benzonatate</b>              | Antitussive Agents                                                                                              |
| <b>Thiocolchicoside</b>         | Muscle Relaxants                                                                                                |
| <b>Eucatropine</b>              | Mydriatics                                                                                                      |
| <b>Dextromethorphan</b>         | Antitussive Agents/Excitatory Amino Acid Antagonists                                                            |
| <b>Isometheptene</b>            | Adrenergic alpha-1 Receptor Agonists/Sympathomimetics/Vasoconstrictor Agents                                    |
| <b>Cinoxacin</b>                | Anti-Infective Agents                                                                                           |
| <b>Levamisole*</b>              | Adjuvants, Immunologic/Antinematodal Agents/Antirheumatic Agents                                                |
| <b>Ursodeoxycholic acid</b>     | Cholagogues and Cholereitics                                                                                    |
| <b>4,5-dianilinophthalimide</b> | Protein Kinase Inhibitors                                                                                       |
| <b>Ifenprodil</b>               | Adrenergic alpha-Antagonists/Excitatory Amino Acid Antagonists/Vasodilator Agents                               |
| <b>CP-320650-01</b>             | ?                                                                                                               |
| <b>Roxithromycin</b>            | Anti-Bacterial Agents                                                                                           |
| <b>Lisuride</b>                 | Antiparkinson Agents/Dopamine Agonists/Serotonin Receptor Agonists                                              |
| <b>lomefloxacin</b>             | Anti-Infective Agents                                                                                           |
| <b>lorglumide</b>               | Hormone Antagonists                                                                                             |

|                                  |                                                                                              |
|----------------------------------|----------------------------------------------------------------------------------------------|
| <b>Piretanide</b>                | Diuretics/Sodium Potassium Chloride Symporter Inhibitors                                     |
| <b>L-methionine sulfoximine*</b> | Enzyme Inhibitors                                                                            |
| <b>Diltiazem</b>                 | Antihypertensive Agents/Calcium Channel Blockers/Cardiovascular Agents/Vasodilator Agents    |
| <b>Tyloxapol</b>                 | Detergents/Surface-Active Agents                                                             |
| <b>Flumequine</b>                | Anti-Infective Agents/Anti-Infective Agents, Urinary                                         |
| <b>Terazosin</b>                 | Adrenergic alpha-1 Receptor Antagonists                                                      |
| <b>Triflusal</b>                 | Platelet Aggregation Inhibitors                                                              |
| <b>Ranitidine</b>                | Anti-Ulcer Agents/Histamine H2 Antagonists                                                   |
| <b>Flucytosine*</b>              | Antifungal Agents/Antimetabolites                                                            |
| <b>Etomidate</b>                 | Anesthetics, Intravenous/Hypnotics and Sedatives                                             |
| <b>Dioxybenzone</b>              | <i>UVB/UVA protection?</i>                                                                   |
| <b>Furaltadone</b>               | Anti-Infective Agents, Urinary                                                               |
| <b>Ornidazole</b>                | Amebicides/Antitrichomonal Agents/Radiation-Sensitizing Agents                               |
| <b>Dicloxacillin</b>             | Anti-Bacterial Agents                                                                        |
| <b>Pindolol</b>                  | Adrenergic beta-Antagonists/Antihypertensive Agents/Serotonin Antagonists/Vasodilator Agents |
| <b>Tretinoin*</b>                | Antineoplastic Agents/Keratolytic Agents                                                     |
| <b>Proscillaridin</b>            | Cardiotonic Agents/Enzyme Inhibitors                                                         |
| <b>Ouabain*</b>                  | Cardiotonic Agents/Enzyme Inhibitors                                                         |
| <b>Beclometasone</b>             | Anti-Asthmatic Agents/Anti-Inflammatory Agents/Glucocorticoids                               |
| <b>Mexiletine</b>                | Anti-Arrhythmia Agents/Voltage-Gated Sodium Channel Blockers                                 |
| <b>Buflomedil</b>                | Vasodilator Agents                                                                           |
| <b>Levobunolol</b>               | Adrenergic beta-Antagonists/Sympatholytics                                                   |
| <b>PHA-00851261E</b>             | ?                                                                                            |
| <b>Estropipate</b>               | Contraceptive Agents                                                                         |
| <b>Ioversol</b>                  | Contrast Media                                                                               |
| <b>0175029-0000</b>              | ?                                                                                            |
| <b>Gelsemine</b>                 | Alkaloids/?                                                                                  |

**Table S2. List of 160 selected molecules and their documented pharmacological classes.** The 35 selected compounds for *in vitro* and *in vivo* evaluation are highlighted in grey. Asterisks (\*) indicate molecules previously evaluated for their antiviral properties against influenza viruses or other viruses according to the literature, and question marks (?) indicate absence of assigned pharmacological class. Documented pharmacological classes were obtained from PubChem (<https://pubchem.ncbi.nlm.nih.gov>).



| Molecule                    | CMAP ( $\mu\text{M}$ ) | EC50 (nM) |
|-----------------------------|------------------------|-----------|
| Monensin                    | 6                      | 3.27      |
| Biperiden                   | 11                     | 0.38      |
| Felbinac                    | 19                     | 34.35     |
| Sulfamonomethoxine          | 14                     | 0.28      |
| Adiphenine                  | 11                     | 6.29      |
| Benzathin Benzylpenicilline | 4                      | 0.26      |
| Gentamycin                  | 3                      | 0.039     |
| Timolol                     | 9                      | nd        |
| Lanatoside C                | 4                      | nd        |
| Alpha-estradiol             | 0.01                   | nd        |
| Apigenin                    | 15                     | 0.21      |
| Amiloride                   | 13                     | 0.41      |
| Ribavirin                   | 16                     | 0.86      |
| Methoxamine                 | 16                     | nd        |
| Tolazoline                  | 20                     | 0.93      |
| Folic acid                  | 9                      | 0.22      |
| Diphenhydramine             | 14                     | 0.25      |
| Roxythromycin               | 5                      | 0.14      |
| Pindolol                    | 16                     | 0.79      |
| Prestwick-1103              | 20                     | 626.63    |
| Carmustine                  | 100                    | 0.07      |
| Clofilium tosylate          | 8                      | 0.16      |
| Prednisone                  | 11                     | nd        |
| Choropyramine               | 12                     | 0.07      |
| Urseodeoxycholic acid       | 10                     | 0.61      |
| Ranitidine                  | 11                     | 0.68      |
| Flucytosine                 | 31                     | 2.02      |
| Diltiazem                   | 9                      | 0.84      |
| Fusidic acid                | 7                      | 0.038     |
| Levamisole                  | 17                     | nd        |
| Sulfadimethoxine            | 13                     | 0.69      |
| Riboflavine                 | 11                     | nd        |
| Genistein                   | 10                     | 1.06      |
| Nimesulide                  | 13                     | nd        |
| Etilefrine                  | 18                     | 0.34      |

**Table S3. List of 35 selected molecules.** CMAP concentration ( $\mu\text{M}$ ) and calculated EC50 in the context of pre-treatment/treatment *in vitro*.

| Influenza virus                         | Treatment  | Dose    | Viral titer (log TCID <sub>50</sub> /ml) | Relative Viral production (% of mock-treated) |
|-----------------------------------------|------------|---------|------------------------------------------|-----------------------------------------------|
| A/Lyon/969/2009 H275Y (H1N1)<br>MOI 0.1 | Diltiazem  | 0       | 4.8                                      | 100                                           |
|                                         |            | CMAP/10 | 3.97                                     | 14.7                                          |
|                                         |            | CMAP    | 2.8                                      | 1.0                                           |
|                                         | Etilefrine | 0       | 4.63                                     | 100                                           |
|                                         |            | CMAP/10 | 3.97                                     | 22.0                                          |
|                                         |            | CMAP    | 2.8                                      | 1.5                                           |
| A/Texas/126/2016 (H3N2)<br>MOI 0.01     | Diltiazem  | 0       | 6.02                                     | 100                                           |
|                                         |            | CMAP/10 | 5.13                                     | 12.75                                         |
|                                         |            | CMAP    | 4.92                                     | 7.9                                           |
|                                         | Etilefrine | 0       | 5.63                                     | 100                                           |
|                                         |            | CMAP/10 | 4.8                                      | 14.7                                          |
|                                         |            | CMAP    | 3.63                                     | 1                                             |
| B/Massachusetts/2/2106<br>MOI 0.1       | Diltiazem  | 0       | 5.3                                      | 100                                           |
|                                         |            | CMAP/10 | 4.3                                      | 10.0                                          |
|                                         |            | CMAP    | 3.97                                     | 4.7                                           |
|                                         | Etilefrine | 0       | 5.13                                     | 100                                           |
|                                         |            | CMAP/10 | 4.3                                      | 15.0                                          |
|                                         |            | CMAP    | 3.97                                     | 7.3                                           |

**Table S4. Evaluation of antiviral efficacy of diltiazem or etilefrine in the context of infection by different influenza strains.** Human lung epithelial cells (A549) were incubated with supplemented medium (mock), or different concentrations of diltiazem (CMAP, 9  $\mu$ M) or etilefrine (CMAP, 18  $\mu$ M). Six hours after treatment, cells were washed and then infected with different prototype human influenza strains (as indicated). One hour after viral infection, a second identical treatment dose in supplemented medium was added. Relative viral titers compared to the mock-treated control are shown. Results are representative of two independent experiments, and confirm the antiviral activity of diltiazem and etilefrine on oseltamivir-resistant A(H1N1)pdm09, as well as wild-type H3N2 and B influenza strains.

| Pre-incubation treatment | Viral titer (log TCID50/ml) |             | Mean relative Viral production (% of mock-treated) |
|--------------------------|-----------------------------|-------------|----------------------------------------------------|
|                          | Dilution #1                 | Dilution #2 |                                                    |
| Control PBS              | 5.3                         | 4.63        | -                                                  |
| Diltiazem (9 $\mu$ M)    | 5.63                        | 4.63        | 156.9                                              |
| Etilefrine (18 $\mu$ M)  | 5.30                        | 4.63        | 100.0                                              |
| Oseltamivir (1 $\mu$ M)  | 5.63                        | 4.30        | 130.3                                              |
| Negative serum           | 4.97                        | 4.30        | 47.7                                               |
| Positive serum           | 3.30                        | 2.53        | 0.9                                                |

**Table S5. Virus pre-incubation with diltiazem or etilefrine does not interfere with early viral entry steps.** Two viral dilutions (#1 and #2, respectively  $10^6$  and  $10^5$  TCID50/mL) were pre-incubated for 1 h with PBS, diltiazem (CMAP, 9  $\mu$ M), etilefrine (CMAP, 18  $\mu$ M), or oseltamivir (1  $\mu$ M). A(H1N1)pdm09 positive and a negative sera were used as controls. After incubation, viral titers (log<sub>10</sub> TCID50/mL) were determined in MDCK cells. Results are representative of two independent experiments and indicate that pre-incubation with either diltiazem or etilefrine does not affect viral titers compared to PBS-incubated control, suggesting that the antiviral effect of these molecules is not mediated by direct drug-virus interactions at early stages of viral entry.

| Hours<br>P.I. | Treatment                       | Apical viral titer                                               |                       | $\Delta$ TEER               |
|---------------|---------------------------------|------------------------------------------------------------------|-----------------------|-----------------------------|
|               |                                 | PFU/ml                                                           | log TCID50/ml         | Ohm/cm <sup>2</sup>         |
|               |                                 | (CI95)                                                           | (CI95)                | (CI95)                      |
| 24            | Mock                            | 7.2 <sup>^</sup> 5 (2.3 <sup>^</sup> 5 – 1.2 <sup>^</sup> 6)     | 6.74 (6.53 – 6.95)    | 59.84 (-35.75 – 155.4)      |
|               | Oseltamivir 0.1 $\mu$ M         | 2.1 <sup>^</sup> 5 (1.6 <sup>^</sup> 4 – 4.1 <sup>^</sup> 5)     | 6.02 (4.69 – 7.35)    | 8.98 (-81.72 – 99.68)       |
|               | Oseltamivir 1 $\mu$ M           | 2.1 <sup>^</sup> 4*** (2.3 <sup>^</sup> 3 – 3.9 <sup>^</sup> 4)  | 5.13*** (4.61 – 5.66) | -24.32 (-58.00 – 9.36)      |
|               | Diltiazem 9 $\mu$ M             | 3.8 <sup>^</sup> 6 (1.6 <sup>^</sup> 5 – 6.0 <sup>^</sup> 5)     | 6.47 (5.03 – 7.90)    | 35.10 (10.96 – 59.23)       |
|               | Diltiazem 90 $\mu$ M            | 3.1 <sup>^</sup> 4*** (1.8 <sup>^</sup> 5 – 4.3 <sup>^</sup> 5)  | 5.57** (4.95 – 6.18)  | 86.13 (3.72 – 168.5)        |
|               | Ose 0.1 $\mu$ M / Dil 9 $\mu$ M | 5.3 <sup>^</sup> 4*** (1.7 <sup>^</sup> 3 – 1.0 <sup>^</sup> 5)  | 6.25 (5.62 – 6.89)    | 34.50 (-33.15 – 102.2)      |
|               | Ose 1 $\mu$ M / Dil 90 $\mu$ M  | 2.3 <sup>^</sup> 4*** (1.9 <sup>^</sup> 4 – 2.7 <sup>^</sup> 4)  | 5.19*** (4.15 – 6.23) | 32.96 (-77.24 – 143.2)      |
| 48            | Mock                            | 2.1 <sup>^</sup> 8 (1.3 <sup>^</sup> 8 – 3.0 <sup>^</sup> 8)     | 9.12 (8.91 – 9.33)    | -2.64 (-233.3 – 228.0)      |
|               | Oseltamivir 0.1 $\mu$ M         | 5.9 <sup>^</sup> 7** (4.9 <sup>^</sup> 7 – 6.8 <sup>^</sup> 7)   | 8.61 (7.43 – 9.80)    | 20.09 (-39.75 – 79.94)      |
|               | Oseltamivir 1 $\mu$ M           | 8.8 <sup>^</sup> 4*** (3.2 <sup>^</sup> 3 – 1.7 <sup>^</sup> 5)  | 6.20*** (5.39 – 7.01) | 7.26 (-85.73 – 100.3)       |
|               | Diltiazem 9 $\mu$ M             | 5.8 <sup>^</sup> 7** (3.0 <sup>^</sup> 7 – 8.5 <sup>^</sup> 7)   | 8.91 (8.67 – 9.16)    | -48.31 (-180.1 – 83.47)     |
|               | Diltiazem 90 $\mu$ M            | 1.0 <sup>^</sup> 5*** (4.4 <sup>^</sup> 4 – 1.5 <sup>^</sup> 5)  | 6.56*** (5.23 – 7.88) | 120.1 (-85.77 – 326.00)     |
|               | Ose 0.1 $\mu$ M / Dil 9 $\mu$ M | 2.3 <sup>^</sup> 6*** (9.7 <sup>^</sup> 5 – 3.6 <sup>^</sup> 6)  | 7.54* (6.92 – 8.17)   | 78.28 (33.37 – 123.2)       |
|               | Ose 1 $\mu$ M / Dil 90 $\mu$ M  | 2.6 <sup>^</sup> 4*** (1.4 <sup>^</sup> 4 – 3.8 <sup>^</sup> 4)  | 5.38*** (5.05 – 5.71) | -8.84 (-58.73 – 41.05)      |
| 72            | Mock                            | 1.2 <sup>^</sup> 8 (3.3 <sup>^</sup> 7 – 2.1 <sup>^</sup> 8)     | 8.48 (8.02 – 8.94)    | -244.1 (-275.2 – -213.0)    |
|               | Oseltamivir 0.1 $\mu$ M         | 4.6 <sup>^</sup> 7* (7.6 <sup>^</sup> 6 – 8.4 <sup>^</sup> 7)    | 8.30 (7.73 – 8.87)    | -110.9* (-256.0 – 34.2)     |
|               | Oseltamivir 1 $\mu$ M           | 1.7 <sup>^</sup> 5*** (7.1 <sup>^</sup> 4 – 2.7 <sup>^</sup> 5)  | 6.85*** (6.14 – 7.56) | 22.55*** (-20.25 – 65.35)   |
|               | Diltiazem 9 $\mu$ M             | 1.9 <sup>^</sup> 7** (-4.7 <sup>^</sup> 5 – 3.9 <sup>^</sup> 7)  | 8.21 (7.28 – 9.14)    | -218.0 (255.6 – -180.4)     |
|               | Diltiazem 90 $\mu$ M            | 2.1 <sup>^</sup> 5*** (1.3 <sup>^</sup> 5 – 3.0 <sup>^</sup> 5)  | 7.38* (6.53 – 8.22)   | -115.5 (-308.5 – 77.52)     |
|               | Ose 0.1 $\mu$ M / Dil 9 $\mu$ M | 1.8 <sup>^</sup> 7** (6.9 <sup>^</sup> 6 – 2.8 <sup>^</sup> 7)   | 8.41 (7.38 – 9.45)    | -37.88** (-215.3 – 139.6)   |
|               | Ose 1 $\mu$ M / Dil 90 $\mu$ M  | 4.7 <sup>^</sup> 4*** (3.8 <sup>^</sup> 4 – 5.7 <sup>^</sup> 4)  | 5.62*** (5.23 – 6.01) | -43.16** (-77.17 – -9.15)   |
| 96            | Mock                            | 2.8 <sup>^</sup> 7 (1.3 <sup>^</sup> 7 – 4.2 <sup>^</sup> 7)     | 7.86 (7.74 – 7.99)    | -267.3 (-288.7 – -246.0)    |
|               | Oseltamivir 0.1 $\mu$ M         | 4.1 <sup>^</sup> 6*** (-2.3 <sup>^</sup> 6 – 1.0 <sup>^</sup> 7) | 7.80 (6.56 – 9.04)    | -209.2 (-271.5 – -146.8)    |
|               | Oseltamivir 1 $\mu$ M           | 1.8 <sup>^</sup> 5*** (6.3 <sup>^</sup> 3 – 3.4 <sup>^</sup> 5)  | 7.09 (5.79 – 8.40)    | 10.67*** (-27.47 – 48.81)   |
|               | Diltiazem 9 $\mu$ M             | 2.3 <sup>^</sup> 6*** (1.9 <sup>^</sup> 6 – 2.7 <sup>^</sup> 6)  | 7.32 (6.43 – 8.22)    | -220.5 (-267.4 – -173.5)    |
|               | Diltiazem 90 $\mu$ M            | 1.6 <sup>^</sup> 5*** (-5.6 <sup>^</sup> 4 – 3.7 <sup>^</sup> 5) | 7.37 (5.97 – 8.76)    | 24.59*** (-10.79 – 59.97)   |
|               | Ose 0.1 $\mu$ M / Dil 9 $\mu$ M | 4.0 <sup>^</sup> 6*** (1.2 <sup>^</sup> 6 – 6.8 <sup>^</sup> 6)  | 7.84 (7.38 – 8.31)    | -149.9* (-379.8 – 80.1)     |
|               | Ose 1 $\mu$ M / Dil 90 $\mu$ M  | 2.9 <sup>^</sup> 4*** (2.1 <sup>^</sup> 4 – 3.7 <sup>^</sup> 4)  | 5.47** (4.38 – 6.56)  | -59.79*** (-97.62 – -21.96) |

**Table S6. Apical viral production and transepithelial electrical resistance (TEER) in infected MucilAir® human airway epithelium (HAE).** MucilAir® HAE were infected on the apical pole with influenza A/Lyon/969/09 (H1N1)pdm09 virus at a MOI of 0.1 and treated on the basolateral pole. Treatments were initiated 5 h after infection and were continued once daily for 4 additional days. \* $p < 0.05$ , \*\* $p < 0.01$  and \*\*\* $p < 0.001$  compared to the infected mock-treated group by one-way ANOVA with Tukey's post-test. Data are representative of at least three independent experiments.
